# Supplementary material for: Live imaging and tracking of genome regions in CRISPR/dCas9 knock-in mice
Source: PubMed Central journal article supplement (PMC6225728; doi:10.1186/s13059-018-1530-1), 2018-11-08
Supplement: 13059_2018_1530_MOESM1_ESM.pdf [file 13059_2018_1530_MOESM1_ESM.pdf]

## **Supplemental Information**

**Figure S1. Characterization of dCas9-EGFP knock-in mice.**

**Figure S2. Visualizing telomere dynamics in dCas9-EGFP knock-in mouse liver.**

**Figure S3. CRISPR *in vivo* imaging of major satellite and single genomic locus in X chromosome in dCas9-EGFP knock-in mice.**

**Figure S4. Compare the telomere dynamics *in vivo* and *in vitro*.**

**Table S1: Primer sequences**

**Table S2: Sequences of plasmids**

**Figure S1. Characterization of dCas9-EGFP knock-in mice.**

(A) Genotyping results of the dCas9-EGFP knock-in mouse strain. (B) RNA expression analysis of dCas9 in different dCas9-EGFP mouse tissues by RT-qPCR. The data are presented as relative expression level after normalization with GAPDH. (C) The Western blotting analysis of dCas9-EGFP protein expression in different mouse tissues. The  $\alpha$ -tubulin was used as a loading control. (D) FACS gating strategies for mouse bone marrow, spleen, and thymus. (E) FACS detection of GFP fluorescence in different immune cells from dCas9-EGFP mice. The data were obtained from at least two mice for each experiment.

**Figure S2. Visualizing telomere dynamics in dCas9 knock-in mouse liver.**

(A) The schematic of *in vivo* CRISPR imaging of telomeres in dCas9-EGFP mouse livers. (B) Representative images for control gRNA and without gRNA in dCas9-EGFP mouse liver. (C) Representative trajectories of telomeres in one hepatocyte of dCas9-EGFP mouse liver (scale bar, 5  $\mu$ m) and trajectories of three individual telomeres with different confined regions (scale bars, 200 nm). The trajectory length is 474 frames. See also Movie S1. The data were obtained from at least two mice for each experiment.

**Figure S3. CRISPR *in vivo* imaging of major satellites and a single genomic locus in X chromosome in dCas9-EGFP knock-in mice.**

(A) Labeling of major satellite in hepatocytes of dCas9-EGFP mice. TagBFP-TRF1 was used as control. Histograms of major satellite foci number distribution in individual nucleus (lower panel). (B) Labeling of a single genomic locus in X chromosome in

dCas9-EGFP mice. Representative images for labeling in male and female mice (left panel). Histograms of foci number distribution in individual nucleus of male and female mice (right panel). The data were obtained from at least two mice for each experiment.

**Figure S4. Compare the telomere dynamics *in vivo* and *in vitro*.**

(A) The schematic of CRISPR imaging and interference (CRISPRii) strategy in dCas9-EGFP mouse. (B) RT-qPCR analysis of TRF1 repression by CRISPRi. The data are presented as relative expression fold change comparing TRF1 gRNA and control gRNA injected dCas9-EGFP mice. (C) MSD curves of individual telomeres (colored curves) and the average MSD curves (bold black curve with shaded area indicating  $\pm$  SE) as a function of time interval between observations. The upper red dashed line: slope=0.5. The bottom red dashed line: slope=0. (D) The left panel is MSD curves of individual telomeres (colored curves) and the average MSD curves (bold black curve with shaded area indicating  $\pm$  SE) as a function of time interval between observations for HepG2 cells in matrix gel cultured for 72 hours. The upper red dashed line: slope=0.5. The bottom red dashed line: slope=0. The right panel is distribution of  $\alpha$  values calculated for individual telomeres of HepG2 cultured on plate (blue) and in Matrix gel for 72h (green). (E) Summary of MSD analysis (Data are shown as mean  $\pm$  SD)

**Table S1: Primer sequences**

| Name        | Sequence                     | Note                                   |
|-------------|------------------------------|----------------------------------------|
| Rosa-SG     | GGCATTCTACACGTTATTGCTGG      | Knock-in site                          |
| TRF1-re-SG1 | CACGGCGCCAGCTGAGGCA          | Repression site                        |
| TRF1-re-SG2 | GAAGGCTCGGCACAGAGAC          | Repression site                        |
| TRF1-re-SG3 | GGGACGCGCCGAGCCGTGA          | Repression site                        |
| Telo-sg     | GTTAGGGTTAGGGTTAGGGTTA       | Labeling site, telomeres               |
| Majset-sg   | CCATATTCCACGTCCTACAG         | Labeling site, major satellites        |
| X386-sg     | CACACACAGCAGAGGATGTG         | Labeling site, X chromosome            |
| P1          | GTACACATCTGTAAAAGGTGGTTCC    | Genotyping primer                      |
| P2          | TAGAGCACAAGCACACAACAC        | Genotyping primer                      |
| P3          | CCATAGAAAAGCCTTGACTTGAGGTTAG | Genotyping primer                      |
| P4          | ATGGGCTATGAACTAATGACCCCG     | Genotyping primer                      |
| P5          | TTACGAGAAGCTGAAGGGG          | Genotyping primer/dCas9<br>qPCR primer |
| P6          | GAACTTGTGGCCGTTTACGT         | Genotyping primer/dCas9<br>qPCR primer |
| P7          | AAGAGAATAGCAGGCATGCTGG       | Genotyping primer                      |
| P8          | GACTTTGGCTGTGAAGAATTTGGAT    | Genotyping primer                      |
| TRF1-F      | TTTCGTCGTA CTGACAGCG         | qPCR primer                            |
| TRF1-R      | GGGAGTGGAAACATCCTTCTGA       | qPCR primer                            |
| GAPDH-F     | TGAAGCAGGCATCTGAGGG          | qPCR primer                            |
| GAPDH-R     | CGAAGGTGGAAGAGTGGGAG         | qPCR primer                            |

**Table S2: Sequences of plasmids**

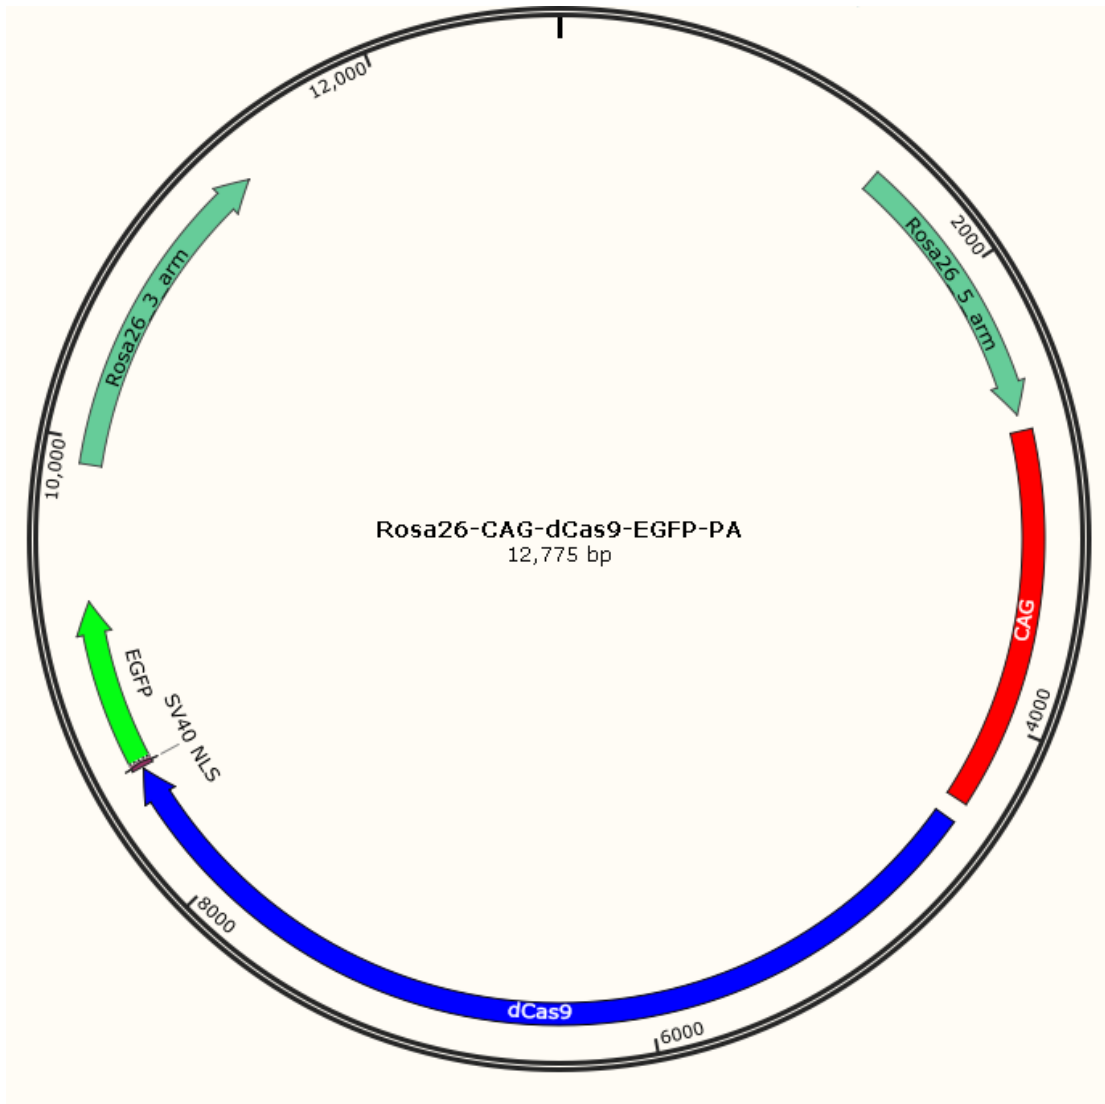

**Rosa26-CAG-dCas9-EGFP-PA**

tggctctgcaactttatcgcctccatccagcttattaattgttgcgggaagctagagtaagtagttcggcagtaaatgttgcgcaactgttggcattgctac  
 aggcactcgtggtgtcacgctcgttggatggcttcattcagctccggtcccaacgatcaaggcgagttacatgatccccatgtgtgcaaaaagcggtta  
 gctcctcggctcctcgatcgttgcagaagtaagttggccgagtggtatcactcatggttatggcagcactgcataattctctactgtcatgccatccgtaagat  
 gctttctgtgactggtgagtactcaaccaagtcattctgagaatagtgatgcgggaccgagttgctcttcccggcgtcaatacgggataataccgcccacat  
 agcagaactttaaaagtgctcatcattggaaaacttctcggggcgaaaactcgaagatcttaccgctgttgagatccagttcagatgtaaccactcgtgac  
 ccaactgatcttcagcatctttacttaccagcgttctgggtgagcaaaaacaggaaggcaaatgccgcaaaaagggaataagggcgacacggaatgt  
 tgaatactcactcttcttttcaatattattgaagcattatcagggtattgtctcatgagcggatacatattgaaatgattagaaaaatacaaaataggg  
 gttccgcgcaatttcccgaaaagtgccacctaaattgaagcgttaaatattgttaaaattcgcgttaaattttgttaaatacagctcatttttaaccaataggg  
 cgaatcggcaaaatcccttataatcaaaagaatagaccgagatagggtgagtggttccagtttggaacaagagtcaccattaaagaacgtggactcca  
 acgtcaaggcgcaaaaacgtctatcaggcgatggcccactcgtgaaccatcacctaatcaagtttttggggtcgaggtgccgtaaaactcaaatcgg  
 aacctaaaggagccccgatttagcgttacggggaaagccggcgaacgtggcgagaaaggaagggaagaaagcgaaggagcggcgctaggcgcc  
 tggcaagtgtagcgtcagctgcgctaaaccacacaccgcccgttaatgcccgtacagggcgctccattcgccattcaggctgcgcaactgttggg  
 aaggcgatcgtgctggcctctcctattacccagctggcgaagggggatgctgcaaggcgattaagtgggtaaccagggttttccagtcacgac  
 gttgtaaacgacggcagtgagcgcgctaatacgaactcactatagggcgaattgggtaccgatcaggcctgtgcacctctggcttctgaggaccgcctg



---

CTTCTACCCCTTTCTTAAGGACAACAGGGAGAAGATTGAGAAAATTCTCACTTTCCGCATCCCCTACTACGTGGGACCCCTC  
GCCAGAGGAAATAGCCGGTTTGCTTGATGACCAGAAAAGTCAGAAGAACTATCACTCCCTGGAATTCGAAGAGGTGG  
TGGACAAGGGAGCCAGCGCTCAGTCATTATCGAACGGATGACTAACTTCGATAAAGAACCTCCCAATGAGAAGGTCCTG  
CCGAAACATTCCTGTCTACGAGTACTTTACCGTGTACAACGAGCTGACCAAGGTGAAATATGTCACCGAAGGGATGAG  
GAAGCCCGCATTCTGTGACGGCAACAAAAGAAGGCAATTGTGGACCTTCTGTTCAAGACCAATAGAAAGGTGACCGTGA  
AGCAGCTGAAGGAGGACTATTTCAAGAAAATTGAATGCTTCGACTCTGTGGAGATTAGCGGGGTGCAAGATCGGTTCAAC  
GCAAGCTGGGTACCTACCATGATCTGCTTAAGATCATCAAGGACAAGGATTTTCTGGACAATGAGGAGAACGAGGACAT  
CCTTGAGGACATTGCTCTGACTCTCACTCTGTTGAGGACCGGGAAATGATCGAGGAGAGGCTTAAGACCTACGCCCATCT  
GTTTCGACGATAAAGTGATGAAGCAACTTAAACGGAGAAGATATACCGGATGGGGACGCCTTAGCCGCAAACCTCATCAAC  
GGAATCCGGGACAACAGAGCGGAAAGACCATTCTTGATTTCTTAAGAGCGACGGATTGCTAATCGCAACTTCATGCA  
ACTTATCCATGATGATTCCTGACCTTAAAGGAGGACATCCAGAAGGCCAAGTGTCTGGACAAGGTGACTCACTGCACGA  
GCATATCGAAATCTGGCTGGTTACCCGCTATTAAGAAAGGGTATTCTCCAGACCGTGAAAGTCGTGGACGAGCTGGTCA  
AGGTGATGGGTGCCATAAACAGAGAACATTGTCATCGAGATGGCCAGGGAAAACAGACTACCCAGAAGGGACAGA  
AGAACAGCAGGGAGCGGATGAAAAGAATTGAGGAAGGGATTAAGGAGCTCGGGTCACAGATCTTAAAGAGCACCCGG  
TGGAAAACACCCAGCTTCAGAATGAGAAGCTCTATCTGTACTACCTTCAAATGGACGCGATATGTATGTGGACCAAGAG  
CTTGATATCAACAGGCTCTCAGACTACGACGTGGACGCCATCGTCCTCAGAGCTTCTCAAAGACGACTCAATTGACAAT  
AAGGTGCTGACTCGCTCAGACAAGAACCGGGAAAGTCAGATAACGTGCCCTCAGAGGAAGTCGTGAAAAGATGAAG  
AACTATTGGCGCCAGCTTCTGAACGCAAAGCTGATCACTCAGCGAAAGTCGACAATCTACTAAGGCTGAGAGGGGCGG  
ACTGAGCGAACTGGACAAAGCAGGATTCATTAACGGCAACTTGTGGAGACTCGGCAGATTACTAAACATGTCGCCCAA  
TCCTTGACTCACGCATGAATACCAAGTACGACGAAAACGACAACTTATCCGCGAGGTGAAGGTGATTACCCTGAAGTCC  
AAGCTGGTCAGCGATTTAGAAAAGGACTTTCAATTCTACAAAGTGCGGGAGATCAATAACTATCATCATGCTCATGACGCA  
TATCTGAATGCCGTGGTGGGAAACCGCCCTGATCAAGAAGTACCCAAAGCTGGAAGCGAGTTCGTGTACGGAGACTACA  
AGGTCTACGACGTGCGCAAGATGATTGCCAAATCTGAGCAGGAGATCGGAAAGGCCACCGCAAAGTACTTCTTCTACAGC  
AACATCATGAATTTCTTAAGACCGAAATCACCTTGCAAACGGTGAGATCCGGAAGAGGCCGCTCATCGAGACTAATGG  
GGAGACTGGCGAAATCGTGTGGGACAAGGGCAGAGATTCGCTACCGTGCGCAAAGTGCTTCTATGCCTCAAGTGAACA  
TCGTGAAGAAAACCGAGGTGCAAACCGGAGGCTTTTCTAAGGAATCAATCCTCCCAAGCGCAACTCCGACAAGCTCATT  
GCAAGGAAGAAGGATTGGGACCCTAAGAAGTACGGCGGATTCGATTCACCAACTGTGGCTTATTCTGTCTGGTCTGTGGC  
TAAGGTGAAAAAGGAAAGTCTAAGAAGCTCAAGAGCGTGAAGGAACTGCTGGGTATCACCATTATGGAGCGCAGCTCC  
TTGAGAAGAACCAATTGACTTTCTCGAAGCAAAGGTTACAAGGAAGTCAAGAAGGACCTTATCATCAAGCTCCAAA  
GTATAGCTGTTCGAAGTGGAGAATGGGCGGAAGCGGATGCTCGCTCCGCTGGCGAACTTCAGAAGGTAATGAGCTG  
GCTCTCCCTCCAAGTACGTGAATTTCTCTACCTTGCAAGCCATTACGAGAAGCTGAAGGGGAGCCCCGAGGACAACGAG  
CAAAGCAACTGTTTGTGGAGCAGCATAAGCATTATCTGGACGAGATCATTGAGCAGATTTCCGAGTTTCTAAACGCGTC  
ATTCTCGCTGATGCCAACCTCGATAAAGTCTTAGCGCATAAATAAGCACAGAGACAAACCAATTCGGGAGCAGGCTGA  
GAATATCATCCACCTGTTACCCTACCAATCTGGTGCCCTGCCGATTCAGTACTTCGACACCACCATCGACCGGAAA  
CGCTATACCTCCACCAAAGAAGTGTGGACGCCACCCTCATCCACCAGAGCATCACCGGACTTTACGAAACTCGGATTGAC  
CTCTCACAGCTCGGAGGGGATGAGGGAGCTCCAAAGAAAAAGCGCAAGGTAGGTAGTTCCgtagcaagggcgaggagctgttc  
accggggtggtgccatcctggtcagctggagcgacgtaaacggccaagttcagcgtgtccggcgagggcgagggcgatgccactacgcaagctga  
ccctgaagttcatctgaccaccgcaagctgcccgtgcccctgcccaccctgtagaccacctgacctacggcgctgagctttagccgctaccccgaccat  
gaagcagcagctcttcaagtcgccatgcccgaaggctacgtccaggagcgaccatcttctcaaggcagcagggcaactacaagaccgcccagggtga  
agttcagggcgacacctggtgaaccgcatcgagctgaagggcatcgaactcaaggaggcagcacaatcctggggcacaagctggagtacaactacaacg  
ccacaactctatatcatggccgacaagcagaagaacggcatcaaggtgaactcaagatccgccaacacatcaggagcggcagctgagctgccaccac  
taccagcagaacaccccatcggcgacggcccgtgctgctgccgacaaccaactacctgagcaccagtcgcccctgagcaagaaccccaagagaagcgcg  
atcacatggtcctgctggagttcgtgaccgccgggatcactctcggatgagcagctgtaacagtaaGCGGCCGCGACTCTAGAGTCGACCTG  
CAGGCATGCAAGCTTactagtaactcctcaggtgcaggctgcctatcagaaggtggtggtgtggccaatgcctgctcacaatacactgagatc

---

---

ttttccctcgcacccccatcatgaagcccttgagcatctgactctggctaataaaggaaatttttattgcaatagtgttggaattttt  
gtgtctcactcgggaggaatggtggcgaatcatcttaaacatcagaatagatttggtttagatttggaacatatgccatagctggctgcatg  
aacaaggttggtataaagaggtcagtatataaaacagccccctgctgcttattccatagaaagccttgacttgaggttagattttttatatt  
tgtttgtgtatttttttctaacaatccccaaatttccctacatggttaactagccagatttttcctcctcctgactactcccgatcatagctgctcctctctta  
tgaagatccctgcgagcgctgctaaagtgtatttccaagctcttcaggacctataatttgcttgactgtgagcaaacacaagtaaaatgattaagc  
aacaatgtatttgtaagcctgggttttaggtttgtgtgtgtgtgtgtgtctctataataatactatccaggggctggagaggtgctcgagttcaagagca  
cagactgctctccagaagtctgagttcaattccagcaaccacatgggtgctcaaccatctgtaaggatctgatccctcctgtgtgtctgaagacca  
caagtgtattcacataaaataaatccctcctcctctcttttttttaagagaatactgctccagtagaatttactgaagtaataaactttgtgtt  
gttccaataggtgagcaataatcaactctttaaagcaactggaatgttccaaggaaactaattttttgaagtgaactggtgagaggagccataac  
tgcagacttggtgatacagaagcaatgagactttaagtctttcttaactaagcaataaagaaataaaattgaaactctagatctctattgtttaaa  
ctgtagctttactaactttgtgtctctatacaaaagctgaaagctagctgagccacttaacatgaaagcaagtaataatttgattcaaaa  
atgtaggccagagtttagcagccaggtggtgctgtccttaagtcccttaactccagcacttgagggcagagacagggcagatctctgagttgagcccagcc  
tggctacacatcaagtcttagatagccaggaatacacagaaaacctgtggggaggggggctgagattcataaaataataatgaagcattccc  
taatgagccataggtgtggctaaatccgtctaccttctgatgagattgggtattttttctgtctgtctggtttggctttgacactgtggcttcttt  
aaagcctcctctgcatgtgttctgttctactaactcccttggttaaattggcaggcttttgccttaagggcagctgctgagattgagcctgatt  
ccaggtggggtgggaatcttcaaacataaaatgtcctttaaatttttttaaaaatgggtataataaacctcataaaatgattatgaggagtgagg  
tggaataatataatgagtcctccctataaaagagctattaaggctttgtcttataacttttttaaatgtgtatctttagaaccaagggcttaga  
gttttagatacagaaactgtgcatcgttaacagattttctagttgtgtcacaggcctgatcggtaacctcagctttgtcccttagtgagggttaattgcg  
cgcttgcgtaacatggtcatagctgttctgtgtgaaattgttatccgtcacaattccacacacatacagagccggaagcataaagttaagcctggggtg  
cctaagagtgtactacataatgctgtgcctcactgcccgttccagtcgggaaacctgctgtccagctgcttaataatcgccaacgagcggtg  
gagaggcggtttgctattggcgctcttcgcttctcgtctgactgctgctgctcggtgctgctggcgagcggtatcagctcactcaagcggtaa  
tacggttaccacagaatcaggggataacgaggaagaacatgtgagcaaaagggcagcaaaagggcaggaaacctgaaaaaggccgctgtgtggctttt  
tccataggctccgccccctgacgagcatcaaaaatcgacgctcaagttagagtggtgcaaaacctgacaggactataagataaccagcgtttcccctgga  
agctccctgctgctcctgctccgacctgcttaccgatacctgtccgcttctccttccgggaaagcgtggccttctcatagctcagctgtaggtatct  
cagttcggttagtgctgctcgaagcgtgggtggtcacgaacccccgttcagcccagccttaccggttaactatcgtcttgagccaaccggg  
taagacacgacttatccactggcagcagccactggtacaggattagcagagcgaggtatgtaggctgtacagagttctgaagtgtggtgactaac  
ggctacactagaaggacagatttggctatctgctcgtgtaagcaggtaccttggaaaaagagttgtgctcttagcggcaaaacaaccagcgtgt  
agcggtggtttttgttgaagcagcagattacgagcaaaaaaggatctcaagaagatccttgatctttctacgggctgacgctcagtggaacgaaa  
actcagttagggtttgtcatgagattatcaaaaaggatcttccactagatcttttaaatataatgaagttaaatacaatcctaagtatatatgagta  
aacttggtctgacagttaccaatgttaacatgagtaggcacctatctcagcgtctgctatctttgcttccatagttgctgactccccgtgtagataactac  
gatacgggagggtaccatctgccccagtgctgcaatgataccgagacccagcctcagggtccagattatcagcaataaacagcagccggaaggg  
ccgagcgcagaag

---



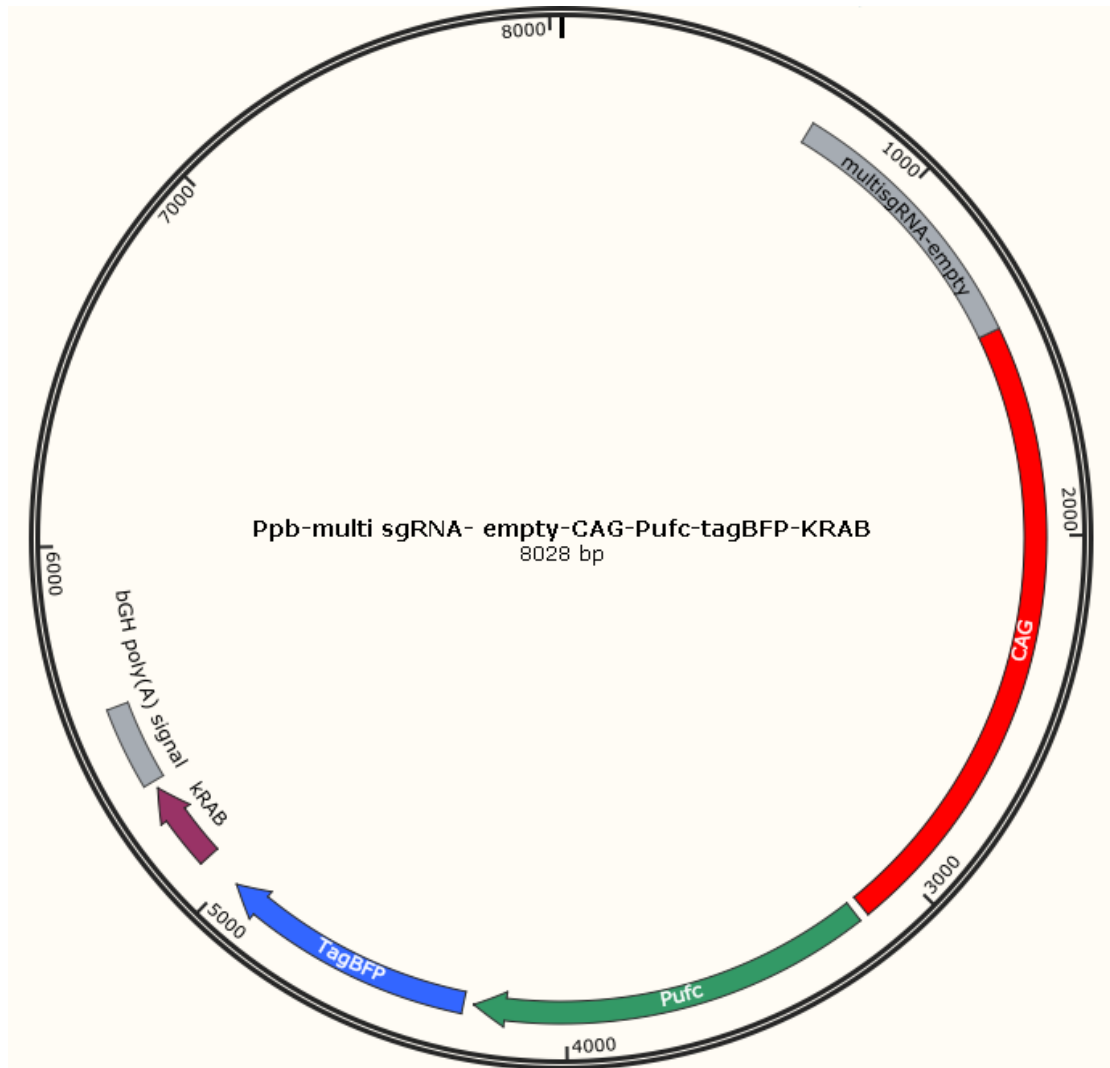

**Ppb-multi sgRNA- empty-CAG-PUFc-TagBFP-KRAB**

```

ctaaattgtaagcgttaatattttgttaaattcgcgttaaattttgttaaattcagctcatttttaaccaataggccgaaatcggcaaaatccctataaatcaaa
agaatagaccgagatagggttgagtggtgtccagtttggacaagagtcactattaaagaactggactccaactcaaaagggcgaaaaaccgtctatcagg
gcatggccactactgtaacctcacctaatcaagtttttgggctcaggtgcccgtaaagcactaaatcggaaccctaaaggagccccgatttagactt
gacggggaaagccggcgaaactggcgagaaaggaaggaagaaagcgaaggagcggcgctagggcgctggcaagtgtagcgtcacgctgcgcgtaac
caccaaccccgccgcttaatgcgcccagggcgctccattcgcattcaggctgcgcaactgttgggaaggcgatcggcgggcctcttcgctatta
cgccagctggcgaaaggggatgtgtcaaggcgattaaagttgggtaaccgggtttccagtcacgactgtgaaacgacggccagtgagcgcgta
atacactcactataggcgcaattgtctagattaacctagaagatagctcgtgtaaaattgacgcatgattctgaaatattgctctctttctaaatagcgc
gaatcgtcgtgtcatttaggacatctagtcgcccgttgagctcccgtgaggcgtctgtcaatgaggtaagtgtcactgatttgaactataacgaccgc
tgagtcaaaatgacgcatgattatctttacgtgacttttaagatttaactacataataattattgtatttcatgttctactactgataacttattatata
atcttctgttagatataCTCTGAGACGatggtgagcaaggcgaggagctgtcaccgggtggtgcccacctggtcagctggacggcgactaaa
cggccacaagttcagcgtgtccggcagggcgaggcgatgccacctacggcaagctgacctgaagctgactgaccaccggcaagctcccgtgcccgtggc
ccacctcgtgaccacctgggctacggcctcagtgcttcccgcctaccggaccatgaagcagcagcacttctcaagtcgcccgaaggctactg
ccaggagcgaccatcttctcaaggacgacggcaactacaagaccgcccagggtgaagttcaggcgacacctgtgaaaccgcatcgagctgaagggc
atcgactcaaCGTCTCtAGGTagatcttgagacaaatggcagttatccacaaatcaactagaatgtagttattaatagtaatacggggctcatt
agttcatagcccatatattgagttccgcttacataacttacggtaaatggcccctggctgaccgccaacgacccccgccattgacgtcaataatgacgtat
gttccatagtaaaccaataggactttccattgacgtcaatgggtggacttattacggtaaacctcccactggcagtcacatcaagtgatcatatgccaagta
cgccccctattgacgtcaatgacggtaaatggcccctggcattatgccagtcacatgacctatgggacttctacttggcagtcacatcagctattgctcag

```

ctattaccatgggtcgaggtgagccccacgttctgcttactctccccatctccccctcccccccccaattttgtattatttttttaattttttgtgacgagc  
atggggcgggggggggggggcgcgccaggcgggggcgggggcgaggggcgggggcgaggcgagaggtgaggcgagcaatcagagc  
ggcgcgctccgaaagtctttttatggcaggcgggcgggcgggccctataaaaaagcgaagcgcggcgggggggagtcgctgcttgccttccccg  
gccccctccgcccctcgccgccccggctgactgaccgcttactccacagggtgagggggcgaggcggccttctctccgggctgaattagcg  
cttggttaatgacggctgcttcttttctggtgctgaaagcctaaagggctccgggagggccctttgtcgggggggagcggctgggggggctgctgctg  
tgtgtgctggtgggagcgccgctgcccggcgctgagcgtcgggcgggcggggcttctgctccgctgctgctgagggggag  
cgggcggggggggctccccggctgcccggggctgaggggaaacaaggtcgctgagggtgtgtgctgggggggtagcaggggggtgtggcgcg  
gggtcgggctgaacccccctgacccccctccccgagttgctgagcacggccggctcggggtcggggctccgtgcccggcggtggcggggctcggctg  
ccggcgggggggtggcggcagggtgggggtgcccggcgggggcgccctcgggcggggagggctcgggggagggcgcgggcgccccggagcgccggc  
ggctgctgaggcgccgagccgagccattgctttatgtaatcgtgagagggcgagggacttctttgccaatctggcggagccgaaatctggga  
ggcgcgcccaccctctagcggcgggcgaaaggtgcccggcgaggaaagaaatggggggggggccttctgctgctgcccgcgcccgtccc  
cttctcatctccagctcggggctgcccagggggagggctgcttccggggggagggcgaggcggggttcgcttctgctgctgaccgggcttagag  
cctctgtaacatgttcatgcttcttcttttctacagctcctgggcaacgtgctggtattgtgctctcatcttttggcaaagaattcgattcaggcgcgcc  
GCCACCATGGGGATCCTCCCCCAAGAAAAGAGGAAGGTATCTAGAGCCGACGCCCTTTTGAAGATTTTCGAAA  
CAACCGGTACCCCAATTTACAACCTGCGGGAGATTGCTGGACATATAATGGAATTTCCAAGACCAGCATGGGTCCAGATT  
CATTAGCTGAAACTGGAGCGTGCCACACCAGCTGAGCGCCAGCTTGTGTTCAATGAAATCTCCAGGCTGCCTACCAACT  
CATGGTGGATGTGTTGTAATTACGTCATTCAGAAGTCTTTGAATTTGGCAGTCTTGAACAGAAGCTGGCTTTGGCAGA  
ACGGATTCGAGGCCAGTCCTGTCATTGGCACTACAGATGTATGGCAGCCGTGTTATCGAGAAAGCTCTTGAGTTTATCC  
TTGAGACCAGCAGAATGAGATGGTTCCGGAACTAGATGGCCATGTCTTGAAGTGTGTGAAAGATCAGAATGGCAATCAC  
GTGGTTGAGAAATGCATTGAATGTGTACAGCCCCAGTCTTTGCAATTTATCATCGAcGCGTTAAGGGACAGGTATTTGCCT  
TATCCACACATCCTTATGGCTGCCGAGTGATTAGAGAATCCTGGAGCACTGTCTCCTGACCAGACACTCCCTATTTTAGA  
GGAGCTTACCAGCACACAGAGCAGCTGGTACAGGATCAATATGGAAgTTATGTAATcGAACATGACTGGAGCACGGTC  
GTCCTGAGGATAAAAAGCAAAATGTAGCAGAAATCCGAGGCAATGTACTTGTATTGAGTCAGCACAAATTTGCAAaCAAT  
GTTGTGcAGAAGTGTGTTACTCACGCTCACGTACGGAGCGCGCTGTGCTCATCGAcGAGGTGTGCACCATGAACGACGGT  
CCCCACAGTGCCTTATACACCATGATGAAGGACCAGTATGCCAACTACGTGGTCCAGAAGATGATTGACGTGGCGGAGCC  
AGGCCAGCGGAAGATCGTCATGCATAAGATCCGGCCCCACATCGCAACTCTTCTGTAAGTACACCTATGGCAAGCACATTCT  
GGCCAAGCTGGAGAAGTACTACATGAAGAACGGTGTGACTTAGGGTTGGATCCAGGTGGAGGTGGAAGCGGTATGAG  
CGAGCTGATTAAGGAGAACATGCACATGAAGCTGTACATGGAGGGCACCGTGGACAACCATCACTTCAAGTGCACATCCG  
AGGGCAAGGCAAGCCCTACGAGGGCACCCAGACCATGAGAATCAAGGTGGTGCAGGGCGGCCCTCTCCCTTCCGCTTC  
GACATCCTGGCTACTAGTCTCTACGGCAGCAAGACCTTCATCAACCACACCAGGCATCCCCGACTTCTTCAAGCAGT  
CCTTCCCTGAGGGCTTACATGGGAGAGAGTACCACATACGAAGACGGGGCGTGCTGACCGCTACCCAGGACACCAGC  
CTCCAGGACGGCTGCCTCATCTACAACGTCAAGATCAGAGGGGTGAACCTTACATCCAACGGCCCTGTGATGCAGAAGAA  
AACACTCGGCTGGGAGGCCTTACCGAGACGCTGTACCCCGTACGGCGGCCTGGAAGGCAGAAACGACATGGCCCTG  
AAGCTCGTGGGCGGGAGCCATCTGATCGCAAACATCAAGACCACATATAGATCCAAGAAACCCGCTAAGAACCTCAAGAT  
GCCTGGCGTCTACTATGTGACTACAGACTGGAAAGAATCAAGGAGGCCAACACGAGACCTACGTCGAGCAGCACGAG  
GTGGCAGTGGCCAGATACTGCGACCTCCTAGCAAACCTGGGGCACAAGCTTAATGGTGGAGGTCGGACCGGAAccaagaag  
aagaggaaggtaggaagtggaaagcccaaaagaaagcggaaagtgggctaccgaaaaaagcgttaaggttACCGGTGGCGGTGGCGGAGGG  
ATGGATGCTAAGTCACTAACTGCCTGGTCCCGACACTGGTGACCTTCAAGGATGATTTGTGACTTACCAGGGAGGA  
GTGGAAGCTGCTGGACACTGCTCAGCAGATCGTGTACAGAAATGTGATGCTGGAGAACTATAAGAACCTGGTTTCTTGG  
GTTATCAGCTTACTAAGCCAGATGTGATCCTCCGTTGGAGAAGGGAGAAGGCCCTAAgCGGCCGgattaattaactgtcct  
tctagttccagccatctgttgttggccccctccccctgcttcttgaacctggaaggtgccaactcccactgtccttcttaataaaatgaggaattgcatgcatt  
gtctgagtaggtgtcattctattgggggggtggggggggcaggacagcaagggggaggattgggaagacaatagcaggatgctggggatgctgggctct  
atggctcgacatactagttaaaagtgttactttatagaagaatgttggtttttttaataataaataaataaataaataaattgtttgtaatttt  
attagatgtaagtataataaataaactaatatctattcaaatataaataaactcgatatacagaccgataaaacacatgctcaattttacgcatgat

tatctttaacgtacgtcacatatgattatctttctagggtaaatctagtatacgcgtgctttgtccctttagtgagggttaattgcgcgcttggcgtaatcatggtc  
atagctgttctctgtgtgaaattgttatccgctcacaattccacacaacatacggagccggaagcataaagttaaagcctgggggtcctaatagagtgagtaactc  
acattaattgctgtgctcactgccgctttcagtcgggaaacctgctgcccagctgcattaatgaatcgccaacgcccggggagaggcggtttgcgtattg  
ggcgctcttcgcttctcgtcactgactgctgctcgctcgctcggtcgtcgctcgggcgagcggtatcagctcactcaaaggcgtaatacggttatccacagaatca  
ggggataacgcaggaagaacatgtgagcaaaaggccagcaaaaggccaggaaccgtaaaaaggccggttgcgtggttttccataggctccgccccctg  
acgagcatcaaaaaatcgacgctcaagtcagaggtggcgaacccgacaggaactataaagataaccaggcgtttccccctggaagctccctcgtgctcctc  
gttccgacctgccccttaccggatacctgctcgtcttctccttcgggaagcgtggcgcttctcatagctcagctgtaggtatctcagttcgggtaggtcgtc  
gtccaagctgggctgtgtgacgaacccccgttcagcccaccgctgccccttatccggaactatcgtcttgagtccaaccggtaagacacgacttatgcc  
actggcagcagccactggaacaggattagcagagcaggatgtaggcgggtctacagagttcttgaagtggtggcctaactacggctacactagaaggaca  
gtattggatctgctctgctgaagccagttaccttcggaaaagagttggtagctcttgatccggcaacaaaccaccgctgtagcgggtggtttttgtttg  
aagcagcagattacgcgagaaaaaaggatctcaagaagatcctttgatctttctacggggtctgacgctcagtggaacgaaaactcacgtaagggtttt  
ggtcatgagattatcaaaaaggatcttccacatagatccttttaataaaaatgaagttttaaatacaatctaaagatataatgagtaacttggctgacagttac  
caatcctaatcagtgaggcacctatctcagcagatctgtctatttcgttcattcagtagttgcctgactccccgctgtagataactacgatacgggagggcttacca  
tctggccccagtgctgcaatgataccgcgagaccacgctcaccggctccagatttatcagcaataaaccagccagccggaaggccgagcgcgagaagtggtcc  
tgcaactttaccgctccatccagctcattaattgttccgggaagctagagtaagtagttcggcagttatagtttgcgcaacgttggcattgctacaggcat  
cgtgggtgcagcctcgtggttggatggctcattcagctccggttccaacgatcaaggcgagttacatgatccccatgttgcaaaaagcggttagctcctt  
cggctcctcagatcgttgcagaagtaagttggccgaggttatcactcatggttatggcagcactgcataattcttactgtcatccatccgtaagatgctttct  
gtgactggtagtactcaaccaagtcattctgagaatagtgatgctggcgaccgagttgctcttcccggcgtaatacgggataataccgcccacatagcaga  
actttaaagtgctcatattggaacgttcttcggggcgaaaactcgaaggatcttaccgctgttgagatccagttcagatgaaccactcgtgacccaact  
gatcttcagcatctttactttaccagcgtttctgggtgagcaaaacaggaaggcaaatgccgcaaaaagggaataaggcgcacggaatgttgaat  
actcatactcttcttttcaatattatgaagcattatcagggttattgtctcatgagcggatacatattgaatgtatttagaaaaataacaaataggggtcc  
gcgcacatttccccgaaaagtccac

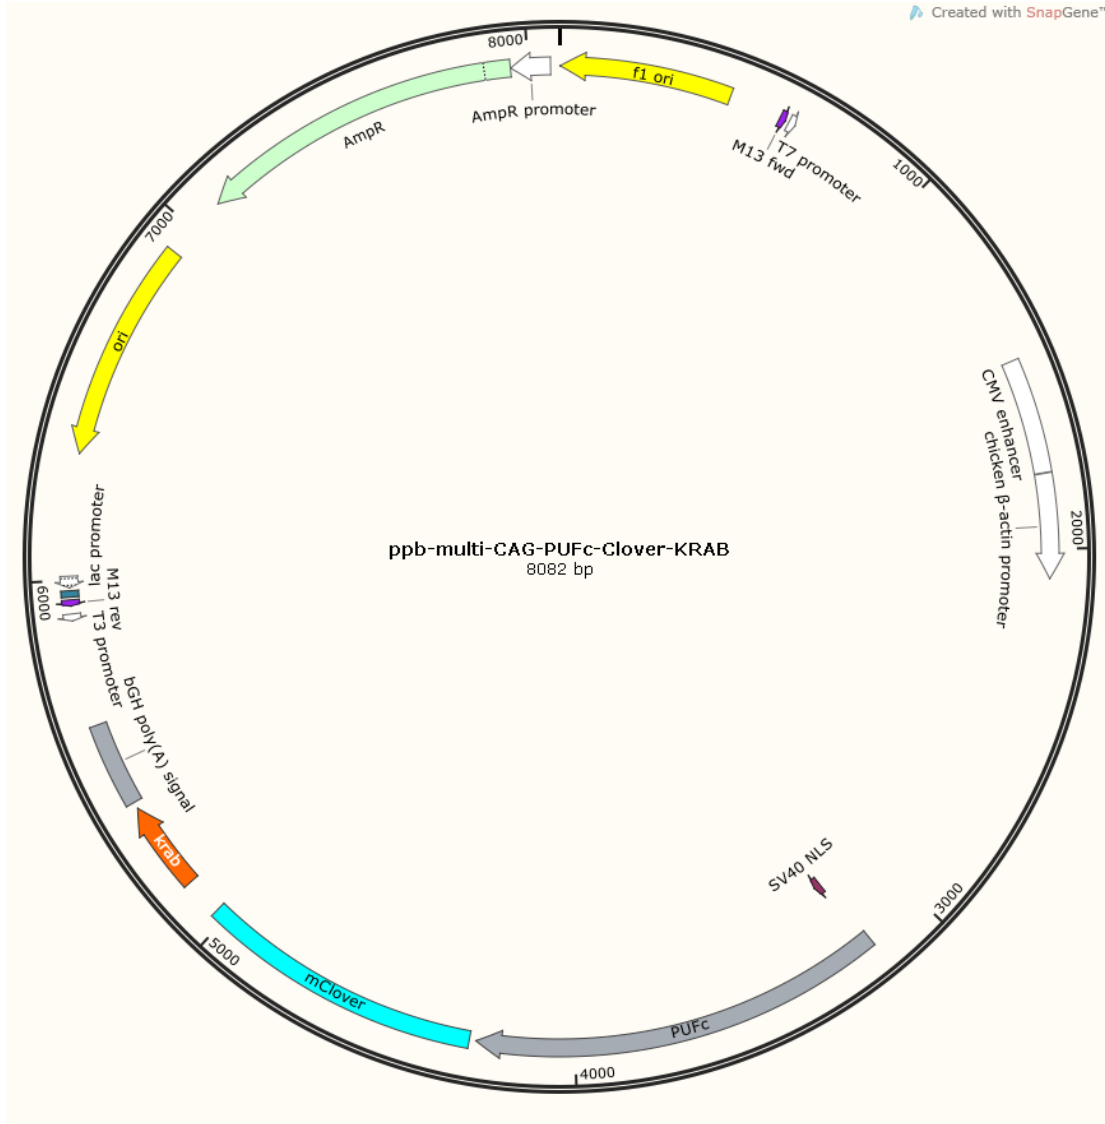

**Ppb-multi sgRNA- empty-CAG-PUFc-Clover-KRAB**

```

ctaaattgtaagcgttaatattttgtaaattcgcgttaattttgtaaactcagctcatttttaaccaataggccgaaatcggcaaaaacctataatcaaa
agaatagaccgagatagggtgagtggttccagtttgaacaagagtcactattaagaacgtggactccaacgtcaaagggcgaaaaaccgtctatcagg
gcatgcccactacgtgaacctcacccatacaagtttttgggctcaggtgccgtaaagcactaaatcggaaccctaaagggagccccgatttagcgtt
gacggggaaagccggcgaaactggcgagaaaggaaggaagaaagcgaaggagcggcgctagggcgctggcaagtgtagcggtcacgctgcgcgtaac
caccaccccccgcttaatgcccgtacagggcgctccattcgcattcaggctgcgaactgttgggaagggcgatcgggtcgggcctcttcgctatta
cgccagctggcgaaaggggatgtgtgcaaggcattaagttgggtaacccagggtttccagtcacgactgtttaaaccgacggccagtgagcgcgta
atagactcactataggcgaaattgtctagattaaccctagaaagatagctcgtgtaaattgacgcatgattcttgaaatattgctctctttctaaatagcgc
gaatcgtcgtgtgatttaggacatctcagtcgcccgttgagctcccgtgaggcgtgtgtcaatcggttaagtgtcactgatttgaactataacgaccg
tgagtcaaaatgacgcatgattatctttacgtgacttttaagatttaactacatacgaataatattgttatttcatgttctactcgtgataacttattatata
atcttctgttagatatacCTCTGAGACGatggtgagcaagggcgaggagctgtccacggggtggtgccatcctggtcagctggaaggcgacgtaaa
cggccacaagttcagctgtccggcgaggcgaggcgatgccacctcaggcaagctgacctgaagctgatctgaccacggcaagctcccgtccctggc
ccacctcgtgaccaccctgggctacggcctcagtgcttcccctaccggaccacatgaagcagcagactcttcaagtcccatgccgaaggctacgt
ccaggagcgaccatcttctcaaggacgacggcaactacaagaccgcgagggtgaagttcgagggcgacacctggtgaaccgcatcgagctgaagggc
atcgactcaaCGTCTCtAGGTagatcttgagacaaatggcagttatccacaaatcaactagaatgctagttattaatagtaataattcaggggtcatt
agttcatagccatataatggagttccgcttacataacttacgtaaatggcccctggctgaccgccaacgacccccgccattgacgtcaataatgacgtat
    
```

gttccatagtaacccaataggactttccattgacgtcaatgggtggactatttacggtaaactgccacttggcagtagatcaagtgatcatatgccaagta  
cgccccctattgacgtcaatgacggtaaatggcccgcctggcattatgccagtagatgaccttgggactttcctacttggcagtagatctacgtattgcatcg  
ctattaccatgggtcgaggtgagccccacgttctgcttctctctccccatctccccccccctccccaccccccaatttgtatttatttttttaattttttgtgcagcg  
atggggcgggggggggggggcgcgccaggcgggcgggcgggcgaggggcgggcgggcgaggcgagaggtgaggcgagccaatcagagc  
ggcgcgctccgaaagtttcttttatggcgaggcgggcgggcgggccctataaaaaagcgaagcgcgggcgggcgggagtcgctgcttgccttccccgt  
gccccgctccgcccgcctcgccgccccccccgctgactgaccgcttactcccacaggtagggcgggcgggccttctctccgggctgtaattagcg  
cttggttaatgacgctgctttcttttctggtgctgtaaacctaaaggctccgggagggccctttgtcgggggggagcggctcgggggctgctgctg  
tgtgtgctggtgggagcgccgctgcccggcctgctcccggcggtgagcctgcccggcgggcgggcctttgtcgctccgctgtgctgaggggag  
cgcgccggggcggtgccccggtgcccgggggctgagggggaacaaggctgctgctgcccgggtgtgtgctggtgggggtagcagggggtgtggcgcg  
gctgctgggctgtaacccccctgacccccctccccagttgctgagcagccccggcttgggtgcccgggctcctgctgcccggcggtgctgcccgt  
ccggcgggggggtggcgaggtgggggctgcccggcgggcgggcgccctggggcggggagggctcgggggagggcgcgccggccccggagcgccggc  
ggctgtagggcgggcgagccgagccattgcttttatgtaatcgtgctgagggcgagggacttctttgtccaaatctggcgggagccgaaatctggga  
ggcgccgcccacccccctagcggcgggcgaggcgaagcggctgcccggcgaggaaagggcggggagggccttctgctgctgcccgcgcccgtccc  
cttctcatctccagctcgggctgcccaggggagcggctgccttgggggggagggcgagggcgggggttggcttctgctgtgaccgcccgtctagag  
cctctgtaacatgttcatgcttcttctttctacagctcctgggcaacgtgctggtattgtgctgtctcatctttggcaagaattcggtaccaggcgccc  
gccaccATGGGGATCCTCCCCCAAGAAAAGAGGAAGGTATCTAGAGGCCGAGCCGCTTTTGAAGATTTTCAAAC  
AACCAGTACCCCAATTTACAAGTGCAGGAGATTGCTGGACATATAATGGAATTTTCCAAGACCAGCATGGGTCCAGATTC  
ATCAGCTGAAACTGGAGCGTGCCACACCAGCTGAGCGCCAGCTTGTGTTCAATGAAATCCTCCAGGCTGCCTACCAACTC  
ATGGTGGATGTTTTGGTAATTACGTCATTAGAAAGTCTTTGAATTTGGCAGTCTTGAACAGAAGCTGGCTTTGGCAGAA  
CGGATTCGAGGCCACGTCCTGTCTTGGCACTACAGATGTATGGCAGCCGTGTTATCGAGAAAAGCTCTTGAATTTATCCTT  
CAGACCAGCAGAATGAGATGGTTCGGGAAGTACAGTGGCCATGTCTTGAAGTGTGTGAAAGATCAGAATGGCAATCACGT  
GGTTCAGAAATGCATTGAATGTGTACAGCCCCAGTCTTTGCAATTTATCATCGAcGCGTTAAGGGACAGGTATTTGCCCTTA  
TCCACACATCCTTATGGCTGCCGAGTGATTAGAGAAATCCTGGAGCACTGTCTCCCTGACCAGACTCCCTATTTTAGAGG  
AGCTTACCAGCACACAGAGCAGCTGGTACAGGATCAATATGGAAGTTATGTAATcAACATGTAAGTGGAGCACGGTCGT  
CCTGAGGATAAAAGCAAAATTGTAGCAGAAATCCGAGGCAATGTACTTGTATTGAGTACACAAATTTGCAAaCAATGT  
TGTGcAGAAGTGTGTTACTCACGCCTCACGTACGGAGCGCGCTGTGCTCATCGAcGAGGTGTGCACCATGAACGACGGTCC  
CCACAGTGCCTTATACACCATGATGAAGGACCAGTATGCCAACTACGTGGTCCAGAAGATGATTGACGTGGCGGAGCCAG  
GCCAGCGGAAGATCGTCATGCATAAGATCCGGCCCCACATCGCAACTTTCGTAAGTACACCTATGGCAAGCACATTCTGG  
CAAAGTGGAGAAGTACTACATGAAGAACGGTGTGACTTAGGGTTGGATCCAGGTGGAGGTGGAAGCGGTATGGTGA  
GCAAGGGCGAGGAGCTGTTACCGGGGTGGTCCCCTCTGGTGCAGCTGGACGGCGACGTAACGGCCACAAGTTCAG  
CGTCCGCGGCGAGGGCGAGGGCGATGCCACCAACGGCAAGCTGACCTGAAGTTCATCTGCACCACCGGCAAGTGCCTCC  
TGCCCTGGCCACCCTCGTGACCACCTTCGGCTACGGCGTGGCTGCTTACGCCGCTACCCCGACCACATGAAGCAGCACG  
ACTTCTTCAAGTCCGCATGCCGAAGGCTACGTCCAGGAGCGACCATCTTTCAAGGACGACGGTACCTACAAGACCC  
GCGCCGAGGTGAAGTTCAGAGGGGACACCCTGGTGAACCGCATCGAGCTGAAGGGCATCGACTTCAAGGAGGACGGCAA  
CATCCTGGGGCACAAGCTGGAGTACAATTCAACAGCCACAACGTCTATATCACGGCCGACAAGCAGAAGAACGGCATCA  
AGGCTAACTTCAAGATCCGCCACAACGTTGAGGACGGCAGCGTGCAGCTCGCCGACCACTACCAGCAGAACCCCCATC  
GGGACGGCCCCGTGCTGCTGCCGACAACCACTACCTGAGCCATCAGTCCGCCCTGAGCAAAGACCCCAACGAGAAGCG  
CGATCACATGGTCTGCTGGAGTTCGTGACCGCCGCGGGATTACACATGGCATGGACGAGCTGTACAAGTCTAGAGGGC  
CCTATTCTATAGTGTACCTAAATGCGGTGGAGGTGGACCCGACCAAGAAGAAGAGGAAGGTAGGAAGTGGAAAGCCC  
AAAGAAAAAGCGAAAGTGGGCTACCGAAAAAGAAGCGTAAGGTTACCGGTGGCGGTGGCGGAGGGATGGATGCTA  
AGTCACTAACTGCCTGGTCCCGGACACTGGTACCTTCAAGGATGTATTTGTGGACTTACCAGGGAGGAGTGGAAAGCTG  
CTGGACACTGCTCAGCAGATCGGTACAGAAATGTGATGCTGGAGAACTATAAGAACCTGGTTTCCTGGGTTATCAGCTT  
ACTAAGCCAGATGTGATCCTCCGGTTGGAGAAGGGAGAAGAGCCCTAAgcccgcgattaattaactgtgcttctagttgccagccat  
ctgtttttccccctccccctgaccttctgacctggaaggtgccactcccactgtccttcttaataaaatgaggaaattgcatgcattgtctgagtaggtgtca

ttctattctgggggtgggggtggggcaggacagcaaggggaggattgggaagacaatagcaggcatgctggggatgcgggtgggctctatggctcgacatact  
 agttaaagttttgtactttatagaagaattttgagtttttttttaataataaataaataaataaattttttgtaattttatttagtataagtg  
 taaataataaaaacttaataatctattcaaataataaataaacctcgatatacagaccgataaaacacatgcgtcaattttacgcatgattactttaacgtacg  
 tcacaatatgattacttttaggttaactagtatacgcgtgcttttgtcccttttagtgagggttaattgcgcgcttggcgtaatcatggcatagctgttccgtg  
 gtgaaattgttatccgctcacaattccacacaacatacagccggaagcataaagtgtaaagcctgggggcctaatgagtgagtaactcacattaattgcgtt  
 gcgctcactgcccgtttccagtcgggaaacctgctgtccagctgcattaatgaatcgccaacgcgcggggagaggcggttgcgtaattggcgctctccgctt  
 cctcgtcactgactcgtcgtcgctggctgctgcggagcggtatcagctcactcaaaggcggtatacggttatccacagaatcaggggataacgcag  
 gaaagaacatgtgagcaaaaggccagcaaaaggccaggaaccgtaaaaaggccgcttggctggcgtttttccataggtccgccccctgacgagcatcaaa  
 aatcgagctcaagtcagaggtggcgaaccggacaggaactaaagatacaggcggtttccccctggaagctccctcgtgcgtcctcgttccgacctgac  
 gcttaccggatacctgtcccctttcctcctgggaagcgtggcgctttctatagctcacgctgtaggtatctcagttcggtgtaggtcgtcgtccaagctggg  
 tgtgtgcagaaacccccgttccgcccgaaccgctgccttatccgtaactatcgtccttagtccaacccggtaagacacgacttatcgccactggcagcagcca  
 ctggtaacaggattagcagagcgaggtatgtagcggtctacagagttctgaagtggcctaactacggctacactagaaggacagtagttgttatctgcg  
 ctctgtgaagccagttaccttgggaaaagagttggttagctctgacccgaaacaaaccacccgctgtagcggtgtttttgttgcaagcagcagattac  
 gcgcagaaaaaaaggtatcaagaagatcctttgatctttctacgggctctgacgctcagtggaacgaaaactcacgtaagggttttggcatgagattac  
 aaaaaggatctcacctagatccttttaaataaaaatgaagttttaaatacaatcctaaagtatatatgagtaaaacttggtcgtgacagttaccaatgcttaacagt  
 gaggcacctatctcagcgatcgtctatttcgttcatccatagttgcctgactcccgtcgtgtagataactacgatacgggagggcttaccttgcccagtgct  
 gcaatgataccgagaccacgctcaccgctccagatttatcagcaataaacagccagccggaaggccgagcgcagaagtgtcctgcaactttatccgc  
 ctccatccagcttattaattgttccgggaagctagagtaagtagttccagttatagtttgcaacggtgttgccattgctacaggcatcgtggtgtcacgctc  
 gtcgtttggatggctcattcagctccggttccaacgatcaaggcgagttacatgatccccatggttgcaaaaaagcggttagctcctcggctcctccgatcgt  
 tgcagaagtaagttggccgagttatcactcatggttatggcagcactgcataattcttactgtcatgccatccgtaagatgtttctgtgactggtgagta  
 ctcaaccaagtcattctgagaatagtgatgcgccgaccgagttgcttcccggtcaatacgggataataccgcgccacatagcagaactttaaagtgt  
 catcattggaaaacgttctcggggcgaaaactcaaggatctaccgctgttgagatccagttcagatgaaccactcgtgcaccaactgatcttcagcatct  
 ttactttcaccagcgttctgggtgagcaaaaacaggaaggcaaaatgccgcaaaaaaggaataagggcgacacggaaatgttgaatactatacttctcct  
 tttcaatattatgaagcatttatcaggttattgtctcatgagcggatacatatttgaatgtatttagaaaaataaacaataggggttccgcacatttccccg  
 aaaagtccac

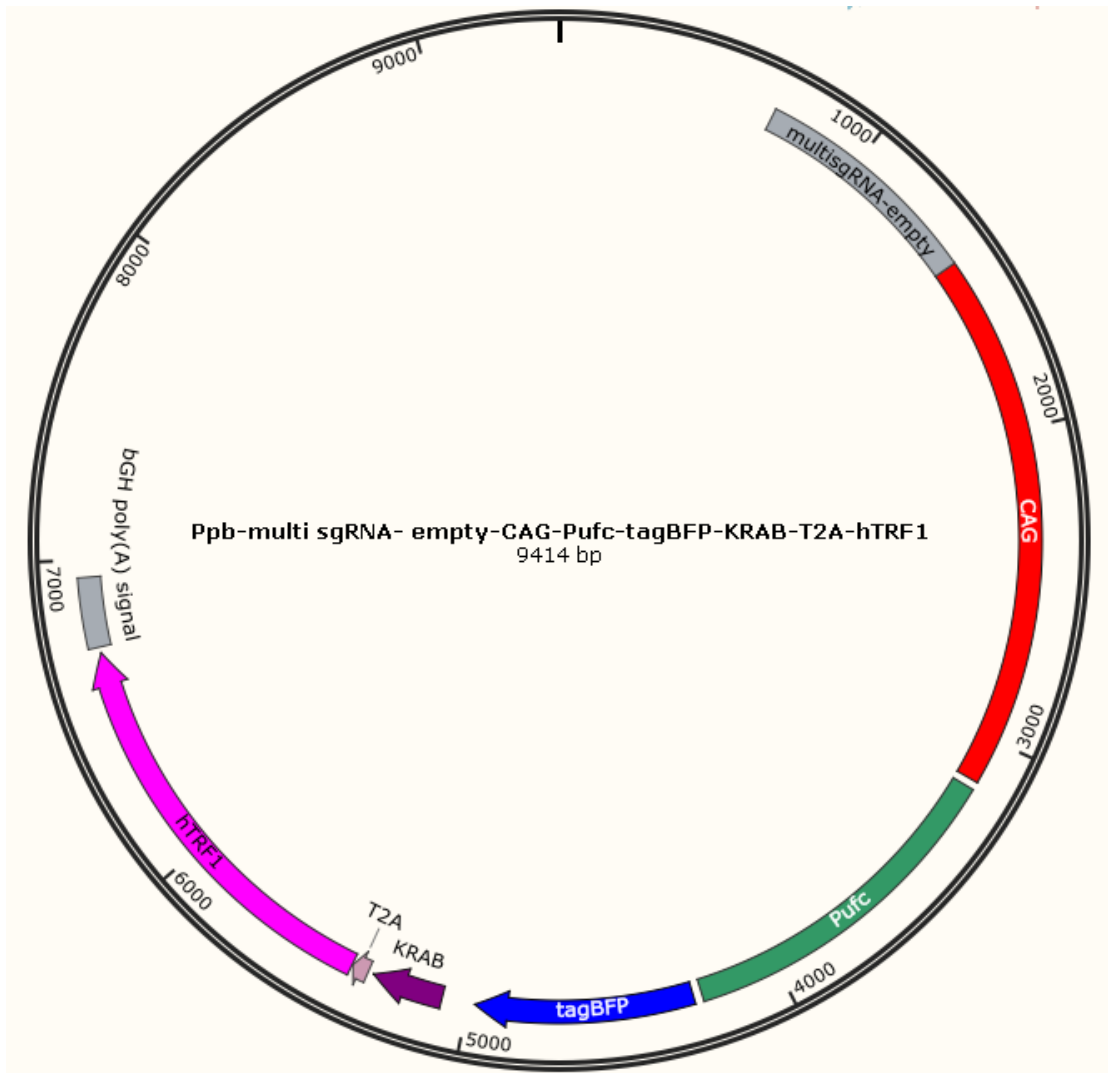

**Ppb-multi sgRNA- empty-CAG-Pufc-TagBFP-KRAB-T2A-hTRF1**

```

ctaaattgtaagcgtaaatatgtttaaattcgcgtaaatatgtttaaattcagctcatttttaaccaataggccgaaatcggcaaaatccttataaatcaaa
agaatagaccgagatagggttgagtggttccagtttggaaacaagagtcactattaaagaacgtggactccaacgtcaaagggcgaaaaaccgtctatcagg
gcatgcccactactgtaaccatcacctaatcaagtttttggggtcgaggtgccgtaaagcactaaatcggaaacctaaagggagccccgatttagagctt
gacggggaaagcggcgaaactggcgagaaaggaaggaagaaagcgaagagcggcgctagggcgctggcaagttagcggctcacgctgcgcgtaac
caccacccgcccgttaatgcccgtacagggcgctccattcgccattcaggctgcgcaactgttggaaagggcgatcggctcgggcctcttgcctatta
cgccagctggcgaaaggggatgtgctgcaaggcattaagtgggtaacccagggtttccagtcacgactgttaaagcagcggccagtgagcgcgta
atagactcactatagggcgaattgttagataaacctagaaagatagctcgtgtaaaattgacgcatgattcttgaatattgctctcttcttaaagcgc
gaatcgtcgtgctgatttagacatctcagtcgcccgttgagctcccgtgagcgtgctgtcaatgaggtaagtgctactgatttgaactataacgaccgcg
tgagcmetaatgacgcatgattatctttacgtgactttaagatttaactcatagataattatgttattcatgttctactactgataacttattatataat
atcttctgttagatataCTCTGAGACGatggtgagcaagggcgaggagctgtaccggggtggtgccatcctgtgctgagctggacggcgagctaaa
cggccacaagttcagcgtgtccggcgagggcgagggcgatgccactacggcaagctgacctgaagctgatcaccacggcaagctcccgtgccctggc
ccacctgtagaccacctgggctacggctgagctgtcccgcctaccggaccacatgaagcagcagcacttctcaagtcgcatgccgaaggctacgt
ccaggagcgcaccatcttcaaggacgacggcaactacaagaccgcccggaggtgaagttcagggcgacacccctggtgaaccgcatcgagctgaagggc
atcgactcaaCGTCTCtAGGTAgatcttgagacaaatggcagttatccacaaatcaactagaatgctagttattaatagtaataattacggggtcatt
agttcatagccatataatggagttccgcttacataactacggtaaatggcccctggtgaccgccaacgacccccgccattgacgtaataatgacgat
gtccatagtaaacccaatagggacttccattgacgtcaatgggtggactttacggtaactgccactggcagtcacatcaagtgatcatatgccaagta

```

cgccccctattgacgtcaatgacggtaaatggcccgcctggcattatcccagtaacatgaccttatgggactttcactctggcagtaacatctacgtattagtcacg  
ctattaccatgggtcgaggtagccccacgttctgcttctactctccccatctccccccctccccacccaattttgatttttttttttaatttttttgtagcgcg  
atggggcgggggggggggggcgcgccagggcgggggcgggggcgagggggcgggggcgagggcgaggtaggtagcggcgagcaatcagagc  
ggcgcgctccgaaagtctttttatggcgaggcgggcgggcgggccctataaaaaagcgaagcgcgcgggggcggggagtgctgctgttcctcgccccgt  
gccccgctccgcccctcgccgccccggctgactgaccgcgttactcccacaggtgagcggggcgggacggcccttctcctcggggctgtaattagcg  
cttggttaatgacggctcgtttcttttctggtgctgtaaaagcctaaagggctccgggagggccctttgtgccccggggagcggctcgggggggtagcgtg  
tgtgtgctgtaggggagcgccgctgcccgcgctgcccggcggtgtagcgtgccccggcgggcggggctttgtgctgcccgtgtagcagggggag  
cgggcgggggcggtgccccgggtgccccggggctgtagggggaacaaagcgtgctgccccggggtagcgtgccccggggtagcagggggtagggcgcg  
gggtgccccgtgtaacccccctgacccccctcccagttgctgagcagggccccggcttggggtaggggctcctgccccggggctgccccggggctcggg  
ccccggggggtagggcgaggtgggggtagccccggggcgggggccctcggggcggggagggctcgggggagggggcgggcgccccggagcgccggc  
ggctgtagggcgggcgagccgagccattgctttatgtaatcgtgtagggggcgagggacttctttgtccaaatctggcgagccgaaatctggga  
ggcgcccgaccccccttagcggcgcgggcgagggtagggtagggtagggtagggtagggtagggtagggtagggtagggtagggtagggtagggtaggg  
cttctcatctccagctcggggtagccgagggggagggctgcttccccgggggagggggcagggcgggggtaggggtagggtagggtagggtagggtaggg  
cctctgtaaccatggtcatgcttctttcttctcctacagctcctgggcaacgtgctggtattgtgctgctcatctttggcaagaattcggatccaggcgcgcc  
GCCACCATGGGGATCCTCCCCCAAGAAAAGAGGAAGGTATCTAGAGGCCGAGCCGCTTTTGAAGATTTTCGAAA  
CAACCGGTACCCAATTTACAACCTGCGGGAGATTGCTGGACATATAATGGAATTTTCCAAGACCAGCATGGGTCCAGATT  
CATTAGCTGAAACTGGAGCGTGCCACACCAGCTGAGCGCCAGCTTGTTCAATGAAATCTCCAGGCTGCTACCAACT  
CATGGTGGATGTGTTTGGTAATTACGTCATTACAGAACTCTTTGAATTTGGCAGTCTTGAACAGAAGCTGGCTTTGGCAGA  
ACGATTTCAGGCCACGTCCTGTCATTGGCACTACAGATGTATGGCAGCCGTTATCGAGAAAGCTCTTGAGTTTATCC  
TTCAGACCAGCAGAATGAGATGGTTCCGGAACTAGATGGCCATGTCTTGAAGTGTGAAAAGATCAGAATGGCAATCAC  
GTGTTTCAGAAATGCATTGAATGTGTACAGCCCCAGTCTTTGCAATTTATCATCGAcCGGTTAAGGGACAGGTATTTGCCT  
TATCCACACATCCTTATGGCTGCCGAGTGATTAGAGAATCTGGAGCACTGTCTCCCTGACCAGCACTCCCTATTTTAGA  
GGAGCTTACCAGCACACAGAGCAGCTGGTACAGGATCAATATGGAAGTTATGTAATCgAACATGTACTGGAGCACGGTC  
GTCTGAGGATAAAAAGCAAAATTGTAGCAGAAATCCGAGGCAATGTACTGTATTGAGTCAGCACAAATTTGCAAaCAAT  
GTTGTGcAGAAGTGTGTTACTCACGCCTCACGTACGGAGCGGCTGTGCTCATCGAcGAGGTGTGCACCATGAACGACGGT  
CCCCACAGTGCCTTATACACCATGATGAAGGACCAGTATGCCAACTACGTGGTCCAGAAGATGATTGACGTGGCGGAGCC  
AGGCCAGCGGAAGATCGTCATGCATAAGATCCGGCCCCACATCGCAACTTCTGTAAGTACACCTATGGCAAGCACATTCT  
GGCCAAGCTGGAGAAGTACTACATGAAGAACGGTGTGACTTAGGGTTGGATCCAGGTGGAGGTGGAAGCGGTATGAG  
CGAGCTGATTAAGGAGAATGCACATGAAGCTGTACATGGAGGGCACCGTGGACAACCATCACTTCAAGTGCACATCCG  
AGGGCGAAGCAAGCCCTACGAGGGCACCCAGACCATGAGAATCAAGGTGGTCGAGGGCGGCCCTCTCCCTTCGCCTC  
GACATCCTGGCTACTAGCTTCTCTACGGCAGCAAGACCTTCAACACACCCAGGCATCCCCGACTTCTTCAAGCAGT  
CCTTCCCTGAGGGCTTACATGGGAGAGATCACACATACGAAGACGGGGCGTGCTGACCGCTACCCAGGACACCAGC  
CTCCAGGACGGCTGCCTCATCTACAACGTCAAGATCAGAGGGGTGAACCTTACATCCAACGGCCCTGTGATGCAGAAGAA  
AACACTCGGCTGGGAGGCCTTACCAGAGCGCTGTACCCGCTGACGGCGGCCTGGAAGGCAGAAACGACATGGCCCTG  
AAGCTCGTGGGCGGGAGCCATCTGATCGAAACATCAAGACCACATATAGATCCAAGAAACCCGCTAAGAACCTCAAGAT  
GCCTGGCGTCTACTATGTGACTACAGACTGGAAGAATCAAGGAGGCCAACACGAGACTACGTCGAGCAGCAGGAG  
GTGGCAGTGGCCAGATACTGCGACCTCCCTAGCAAACCTGGGGCACAAGCTTAATGGTGGAGGTGCGACCGGAcccaagaag  
aagaggaaggttaggaagtgaagcccaagaaaaagcggaaagtgggctaccgaaaaagaagcgttaaggttACCGGTGGCGGTGGCGGAGGG  
ATGGATGCTAAGTCACTAAGTGCCTGGTCCCAGACTGGTACCTTCAAGGATGTAATTTGTGGACTTACCAGGGAGGA  
GTGGAAGCTGCTGGACTGCTCAGCAGATCGTGTACAGAAATGTGATGCTGGAGAACTATAAGAACCTGTTTCTTGG  
GTTATCAGCTTACTAAGCCAGATGTGATCCTCCGTTGGAGAAGGGAGAAGACCcggcggggtccggaggagagggcagagg  
aagtcttcaacatcggtgacgtggaggagaatcctggcccagcggaggatgtttctcagcggccccgagccccgggggctgtgaggatggttagggatgccg  
accctactgaggagcagatggcagaaacagagagaacgacgaggagcagttcgaatgccaggaactgctcagtgccaggtgaggtgggggccccgag  
gaggaggaggaggaggaggacgggctggggcggaggcggggcggctgcccggctgctcagtttctcctctcttcttccgagctttc



cgcgacggccgctccgaggactccgaggacccgcaacagcgagaggctattatcatggactatccagttaacagcttgcagttgagaacgatatacata  
tgtcagttttgacaagaattgcagcaggaaaaaccttgatgcacagtttgaaaatgatgaacaattacaccttgaatcagccctgatgattggggttca  
attgaaaaggacaatgacaactcatgaagaatacagaatttaataaaattcaggctatagctgttggatggaatggcaacttaagaagcagaag  
aagtcttgaagaatatttgggtatccaattctcatatgccttcaaaagcaaattgcttatgataatctcagaagatacatttctcttttcaacact  
cagctacaaccatgatggagaaaattaagagttatgtgaattatgtctaagtgaataatcatcaaccttctaataaggcagcggcaaaaagtagtagaa  
agcaaaaggacaagaacaataacttcaagataaacctagtggaatgatgtgaaatggaaactgaagctaattggatacaagaaaaagtgtagtagaca  
aacagctgcggtaactgaatcctcagagggtacagatccttattgaggtctcaagaatcttttctatctaagttgcaacatggaaccgacaagaacct  
taataagaagaagaagagtaggaactctcaagtaaaaaaagaaaaagaaagcagaagagccactgaaagcagaatacctgttcaagagtcag  
ccgtaactctgaaaaacatcgagctagaaaaagacaggcatggcttgggaagaagacaagaattgagatctggcgtgaggaaatggagagggaaac  
tggctcaaaatactgttcattataaattcaacaaccggacaagtgatgtaaaagacagatggaggaccatgaagaaactaaaactgatttctcagacag  
cgaagactgagCGCCGgattaattaactgtgcctttagttccagccatctgttggcttccccctccccctgcttcttgacctggaaggtgcaactcca  
ctgctcttctataaaaatgaggaaattgcatcgattgtctgagtaggtgtcattctattctgggggtgggggtggggcaggacagcaagggggaggattggg  
aagacaatagcaggcatgctggggatgctggggctctatggctcgacatactagttaaagtttggtaacttataagaagaaatggagtttttttttaa  
taataaataaataaataaataattgtttgtaattattattagtagtaagtgaataataaataaactaatatctattcaataaataaataaacctgatat  
acagaccgataaaacatcgctcaatttacgcatgattatcttaacgtacgtcacaatatgattatcttctagggttaactagtagacgctgctttgtcc  
ctttagtaggggtaattgcgcttggcgtaatcatggtcatagctgttctgtgtaaatgttatccgctcacaattccacacaacatacagccggaagcat  
aaagtgaagcctggggctctaatgagtgagctaacctacattaattgcttgcctcactgccccttccagtcgggaaacctgtgctgagctgattaa  
tgaatcgccaacgcggggagaggcggtttgcgtattggggctctccgcttctcgtcactgactcgtcgtcgtcgtgcttgcggctgagcggtatc  
agctcactcaaggcggtaatacggttatccacagaatcaggggataacgaggaaagacatgtgagcaaaaggccagcaaaaggccaggaacctgaaaa  
aggccggttctgctgcttttccataggtcggccccctgacgagcatcaaaaaatcgacgctcaagtcagaggtggcgaacccgacaggactataaga  
taccaggcgtttccccctggaagctcctcgtgctctctgcttccgacctgcttaccggatacctgtccgcttctcccttccggaagcgtggcgttctca  
tagctcagctgtaggtatctcagttcggtgtaggtcgtctccaagctgggctgtgtgacgaacccccctgagccccagcctgacgttaccgtaact  
atcgtctgagccaacccgtaagacacgacttatcgccactggcagcagccactggaacaggattagcagagcaggtatgtagggctgctacagagttct  
tgaagtgtggcctaactacggctacactagaaggacagtatttggatctgctgctgtaagccagttacctcgaaaaagagttggtagcttctgatccgg  
caacaacaccctgtagcgtggttttttggcaagcagcagattacgagcaaaaaaaggatctcaagaagatccttgatctttctacggggtct  
gacgctcagtggaacgaaaactcaggttaagggatttggctagattataaaaaggatctcactagatccttttaataaaatgaagtttaaatca  
atctaaagtataatagtaaaacttggtctgacagttaccaatgcttaacagtgaggcactatctcagcgatctgtctatttcttcatcatagttgctgactc  
cccgtcgtgtagataactacgatacgggagggcttaccatctgccccagtgctcaatgataccgagacccacgctcaccgctcagatttatcagcaata  
aacagccagccggaaggccgagcgaagaagtgctcaacttaccgctcatcagcttataattgttccgggaagtagagtaagtagttcgcca  
gttaatagtttgcgaactgttgcattgctacagcagctggtgtcagctcgtgttggatggcttattcagctccggttcccaacatcaaggcaggt  
acatgatccccatgtgtgcaaaaagcgttagctccttccgctcctccatcgttgcagaagtaagttggccgagttatcactcatggttatggcagcact  
gcataattcttactgtcatccatccgtaagatgtttctgtgactggtgagtactcaaccaagtcattctgagaatagtgtagcggcgaccgagttgctcttg  
ccggcgtcaatacgggataataccgcccacatagcagaacttaaaagtgctcatcattgaaaacgttcttccggggcgaaaactcagagatcttaccgt  
gttagatccagttcagtagtaaccactgtgacccaactgatctcagatcttttacttaccagcgttctgggtgagcaaaaacaggaaggcaaaatgccc  
gcaaaaaagggaataaggcgacaggaatgtgaatactacatacttcttttcaatatttgaagcatttatcagggttattgtctatgagcggatata  
tatttgaatgtatttagaaaaataaacaataggggtccgacatttccccgaaaagtccac

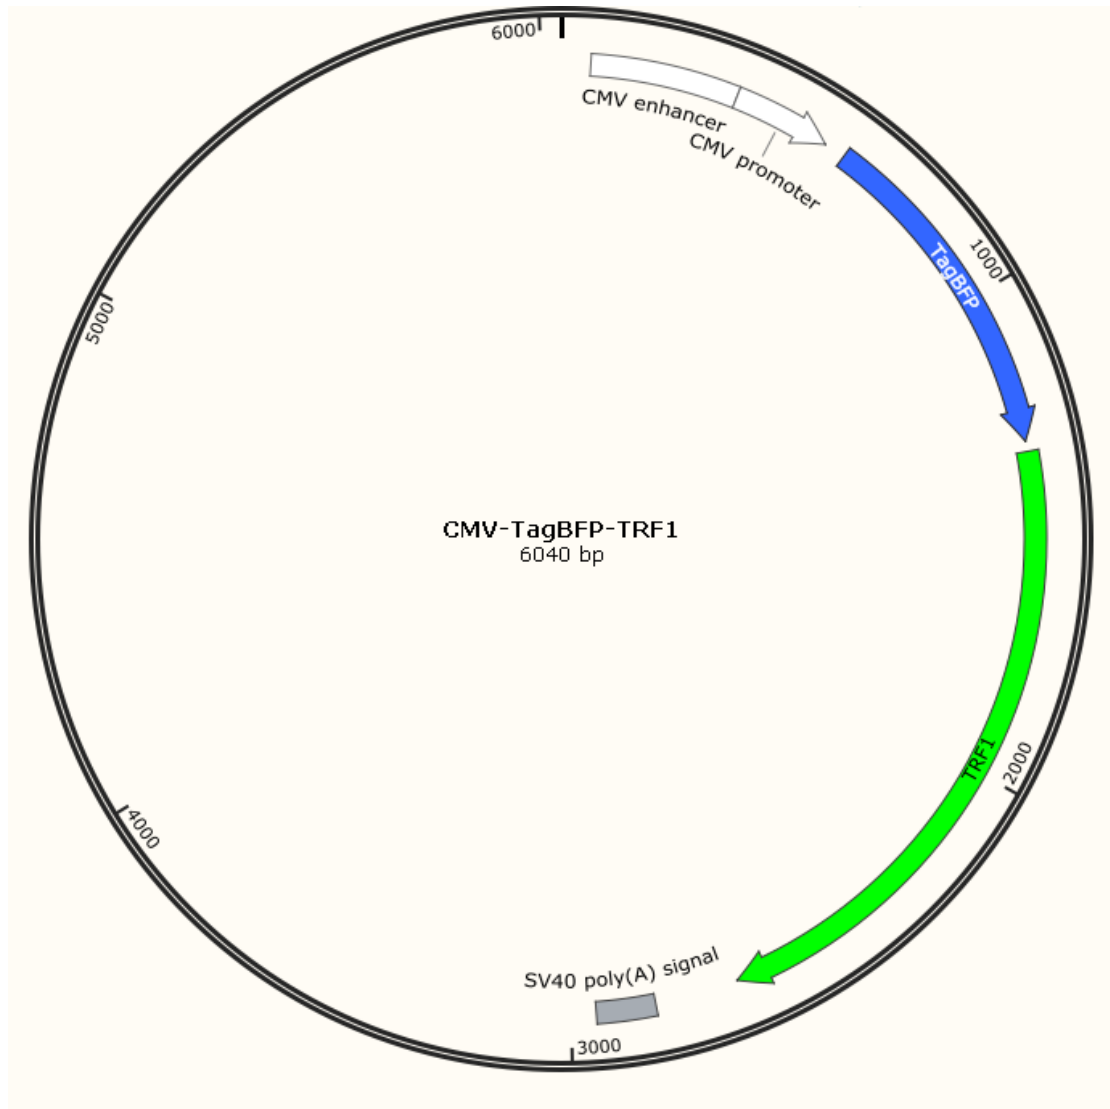

**CMV-TagBFP-TRF1**

```

TAGTTATTAATAGTAATCAATTACGGGGTCATTAGTTCATAGCCATATATGGAGTTCGCGTTACATAACTACGGTAAAT
GGCCCCCTGGCTGACGCCCAACGACCCCGCCATTGACGTCAATAATGACGTATGTTCCCATAGTAACGCCAATAGGG
ACTTCCATTGACGTCAATGGGTGGAGTATTACGGTAAACTGCCCACTGGCAGTACATCAAGTGTATCATATGCCAAGT
ACGCCCCCTATTGACGTCAATGACGGTAAATGGCCCCCTGGCATTATGCCCAGTACATGACCTTATGGGACTTTCCTACTT
GGCAGTACATCTACGTATTAGTCATCGCTATTACCATGGTGATGCGGTTTTGGCAGTACATCAATGGGCGTGGATAGCGGT
TTGACTCACGGGGATTCCAAGTCTCACCCCATGACGTCAATGGGAGTTTGTGTTTGGCACCAAATCAACGGGACTTTC
AAAATGTCGTAACAACCTCCGCCCATGACGCAAATGGGCGGTAGGCGGTACGGTGGGAGGTCTATATAAGCAGAGCT
GGTTTAGTGAACCGTCAGATCCGCTAGCGCTACCGGTcgccaccATGAGCGAGCTGATTAAGGAGAACATGCACATGAAGC
TGTACATGGAGGGCACCGTGGACAACCATCACTTCAAGTGCACATCCGAGGGCGAAGGCAAGCCCTACGAGGGCACCCA
GACCATGAGAATCAAGGTGGTCGAGGGCGGCCCTCTCCCTTCGCCTTCGACATCCTGGCTACTAGTTCCTCTACGGCAGC
AAGACCTTCATCAACCACACCCAGGGCATCCCGACTTCTTCAAGCAGTCTTCCCTGAGGGCTTCACATGGGAGAGAGTC
ACCACATACGAAGACGGGGCGTGTGACCGCTACCCAGGACACCAGCCTCAGGACGGCTGCCTCATCTACAACGTCAA
GATCAGAGGGGTGAACTTCACATCCAACGGCCCTGTGATGCAGAAGAAAACACTCGGCTGGGAGGCCTCACCGAGACG
CTGTACCCCGCTGACGGCGGCCTGGAAGGCAGAAACGACATGGCCCTGAAGCTCGTGGGCGGGAGCCATCTGATCGCAA
ACATCAAGACCACATATAGATCCAAGAAAACCGCTAAGAACCTCAAGATGCCTGGCGTCTACTATGTGGACTACAGACTG
GAAAGAATCAAGGAGGCCAACAACGAGACCTACGTCGAGCAGCACGAGGTGGCAGTGCCAGATACTGCGACCTCCCTA

```

GCAAAGTGGGGCACAAAGCTTAATccGGACTCAGATCTCGAGCTcaaattgCGgaggatgttctctcagcgccccgagccccggggctgtg  
cggatggttaggatgccgacctactgaggagcagatggcagaacagagagaaacgacgaggagcagttcgaatgccaggaactgctcagtgccaggtgc  
aggtggggggccccgaggaggaggaggaggaggacgCGggcctggtggcggagggcggcgtggctgcccgtggatgctcatttctctgctc  
ctctctttgccgagcttccgcaagcggcctccgaggactccgaggaccgcaacagcgagaggctattatcatggactaccagttcaacagcttccagt  
tgagaacgatatacatatgtcagttttgacaagaattgcagcaggaaaaacccttgatgcacagtttgaatgatgaacgaattacaccttggaatcagccc  
tgatgattggggttaattgaaaaggaacatgacaaactcatgaagaatacagaatttaataaaattcaggctatagctgtttgatggaaaatggcaact  
ttaaagaagcagaagaagtctttaaagaatattggatcctcaattctcatatgctttcaaaagcaattgctatgataatctctcagaaagatacttca  
ttctttttcaacacttcagctacaaccacatgatggagaaaattaagagttatgtgaattatgtgtaagtgaataatcaacctttctaatgaaggcagcg  
gcaaaagtagtagaaaagcaaaaggacaagaacaataactctcaagataaaacctagtgtaagatggtgaaatgaaactgaagtaattggatacaaga  
aaaagtgttagtgacaaacagctcgcgtaactgaatcctcagagggtacagatccttattgaggtcacaagaatctttcttaactaagtgaacatggaa  
cccagcaacaagaccttaataagaagaagaagagtaggaactcctcaagtaaaaaagaaaaaagaagcagaagagccactgaaagcagaatac  
ctgtttcaaaagctcagccgtaactcctgaaaaacatcgagctagaaaaagacagcagctgtttgggaagaagacaagaatttgagatcggcgtgaggaa  
atatggagagggaactgtgtaaaatactgttcattataaattcaacaaccggacaagtgtcatgttaaagacagatggaggacctgaagaaactaaaa  
ctgatttctcagacagcaagactgaAGCTCAAGCTTCAATTTGAGTGCAGTGCAGGGTACCGGGGCCGGGATCCACCGGATCTA  
GATAACTGATCATAATCAGCCATACCACATTTGTAGAGGTTTTACTTGCTTTAAAAAACCCTCCACACCTCCCCCTGAACCTG  
AAACATAAAATGAATGCAATTGTTGTTGTTAACTTGTATTGTCAGCTTATAATGTTACAAATAAAGCAATAGCATCACA  
AATTTACAAATAAAGCATTTTTTCACTGCATTCTAGTTGTGGTTGTCCAAACTCATCAATGTATCTTAACGCGTAAATTG  
TAAGCGTTAATATTTTGTAAAATTCGCGTTAAATTTTTGTTAAATCAGCTCATTTTTTAACCAATAGGCCGAAATCGGCAA  
AATCCCTTATAAATCAAAAGAATAGACCGAGATAGGGTTGAGTGTGTTCCAGTTTGAACAAGAGTCCACTATTAAGA  
ACGTGGACTCCAACGTCAAAGGGCGAAAAACCGTCTATCAGGGCGATGGCCACTACGTGAACCATCACCTAATCAAGT  
TTTTGGGGTTCGAGGTGCCGTAAAGCACTAAATCGAACCTAAAGGGAGCCCCGATTAGAGCTTGACGGGAAAGCC  
GGCGAACGTGGCGAGAAAGGAAGGGAAGAAAGCGAAAGGAGCGGGCGCTAGGGCGCTGGCAAGTGTAGCGGTACGC  
TGCGGTAACCACCACACCCGCGCTTAATGCGCCGTACAGGGCGCTCAGGTGGCACTTTTCGGGAAATGTGCGC  
GGAACCCCTATTTGTTATTTTTCTAAATACATTCAAATATGTATCCGCTCATGAGACAATAACCTGATAAATGCTCAATA  
ATATTGAAAAAGGAAGAGTCTGAGGCGGAAAGAACCAGCTGTGGAATGTGTGTCAGTTAGGGTGTGAAAGTCCCCAG  
GCTCCCCAGCAGGCAGAAGTATGCAAAGCATGCATCTCAATTAGTCAGCAACCAGGTGTGGAAGTCCCCAGGCTCCCCA  
GCAGGCAGAAGTATGCAAAGCATGCATCTCAATTAGTCAGCAACCATAGTCCCGCCCTAACTCCGCCCATCCCGCCCTA  
ACTCCGCCAGTTCGCCCATTTCCGCCCATGGCTGACTAATTTTTTTATTTATGCAGAGGCCGAGGCCCTCGCCTC  
TGAGCTATCCAGAAGTGTGAGGAGGCTTTTTGGAGGCCTAGGCTTTGCAAAGATCGATCAAGAGACAGGATGAGG  
ATCGTTTCGATGATTGAACAAGATGGATTGCACGCAGGTTCTCCGGCGCTTGGGTGGAGAGGCTATTCGGCTATGACT  
GGGCACAACAGACAATCGGCTGCTGATGCCGCGTGTCCGGCTGTGAGCGCAGGGCGCCCCGTTCTTTTTGTCAAGA  
CCGACCTGTCCGGTGCCTGAATGAACTGCAAGACGAGGCAGCGCGGCTATCGTGGCTGGCCACGACGGGCGTTCCTTGC  
GCAGCTGTGCTCGACGTTGTCACTGAAGCGGGAAGGGACTGGCTGCTATTGGGCGAAGTCCGGGGCAGGATCTCCTGTC  
ATCTCACCTTGCTCCTGCCGAGAAAGTATCCATCATGGCTGATGCAATGCGGCGGCTGCATACGCTTGATCCGGCTACCTGC  
CCATTCGACCACCAAGCGAAACATCGCATCGAGCGAGCACGTAAGGATGGAAGCCGGTCTTGTGATCAGGATGATCT  
GGACGAAGAGCATCAGGGGCTCGCGCCAGCCGAACTGTTCCGACGGCTCAAGGCGAGCATGCCGACGGCGAGGATCTC  
GTCGTGACCATGGCGATGCCTGCTTGCCGAATATCATGGTGGAAAATGGCCGCTTTTCTGGATTACGACTGTGGCCGG  
CTGGGTGTGGCGACCGCTATCAGGACATAGCGTTGGCTACCCGTGATATTGCTGAAGAGCTTGGCGGCAATGGGCTGA  
CCGTTCTCTGCTTACGGTATCGCCGCTCCGATTGCGAGCGCATCGCCTTCTATCGCCTTCTTACGAGTCTTCTGAG  
CGGGACTGTGGGTTGAAATGACCGACCAAGCGACGCCAACCTGCCATCACGAGATTCGATTCCACCGCCGCTTCTA  
TGAAAGTTGGGCTTCGGAATCGTTTTCCGGGACCGCGCTGGATGATCTCCAGCGGGGATCTCATGTGGAGTCTT  
CGCCACCCTAGGGGGAGGCTAACTGAAACACGGAAGGAGACAATACCGGAAGGAACCCGCGCTATGACGGCAATAAA  
AAGACAGAATAAAACGCACGGTGTGGGTGCTTTGTTTCATAAACGCGGGTTCGGTCCCAGGGCTGGCACTGTGCGATA  
CCCCACGAGACCCATTGGGGCAATACGCCGCTTCTCTTTTCCCCACCCCAAGTTCGGGTGAAGGCC

AGGGCTCGCAGCCAACGTCGGGGCGGCAGGCCCTGCCATAGCCTCAGGTTACTCATATATACTTTAGATTGATTTAAAAC  
TCATTTTAAATTTAAAAGGATCTAGGTGAAGATCCTTTTTGATAATCTCATGACCAAATCCCTTAACGTGAGTTTTCGTTCC  
ACTGAGCGTCAGACCCCGTAGAAAAGATCAAAGGATCTTCTGAGATCCTTTTTTCTGCGCGTAATCTGCTGCTTGCAAAC  
AAAAAAACCACCGTACCAGCGGTGGTTTGGTTGCCGGATCAAGAGCTACCAACTCTTTTCCGAAGGTAACGGCTTCAG  
CAGAGCGCAGATACCAAATACTGTCCTTCTAGTGTAGCCGTAGTTAGGCCACCACTTCAAGAACTCTGTAGCACCGCTAC  
ATACCTCGCTCTGTAATCCTGTTACCAGTGGCTGCTGCCAGTGGCGATAAGTCGTGTCTTACCGGGTTGGACTCAAGACG  
ATAGTTACCGGATAAGGCGCAGCGGTGGGCTGAACGGGGGGTTCGTGCACACAGCCAGCTTGGAGCGAACGACCTAC  
ACCGAACTGAGATACCTACAGCGTGAGCTATGAGAAAGCGCCACGCTTCCGAAGGGAGAAAGGCGGACAGGTATCCGG  
TAAGCGGCAGGGTCGGAACAGGAGAGCGCACGAGGGAGCTTCCAGGGGGAAACGCCTGGTATCTTTATAGTCTGTCCGG  
GTTTCGCCACCTCTGACTTGAGCGTCGATTTTTGTGATGCTCGTCAGGGGGCGGAGCCTATGGAAAAACGCCAGCAACG  
CGGCCTTTTACGGTTCCTGGCCTTTTGTGCTCACATGTTCTTCTGCGTTATCCCCTGATTCTGTGGATAACC  
GTATTACCGCCATGCAT

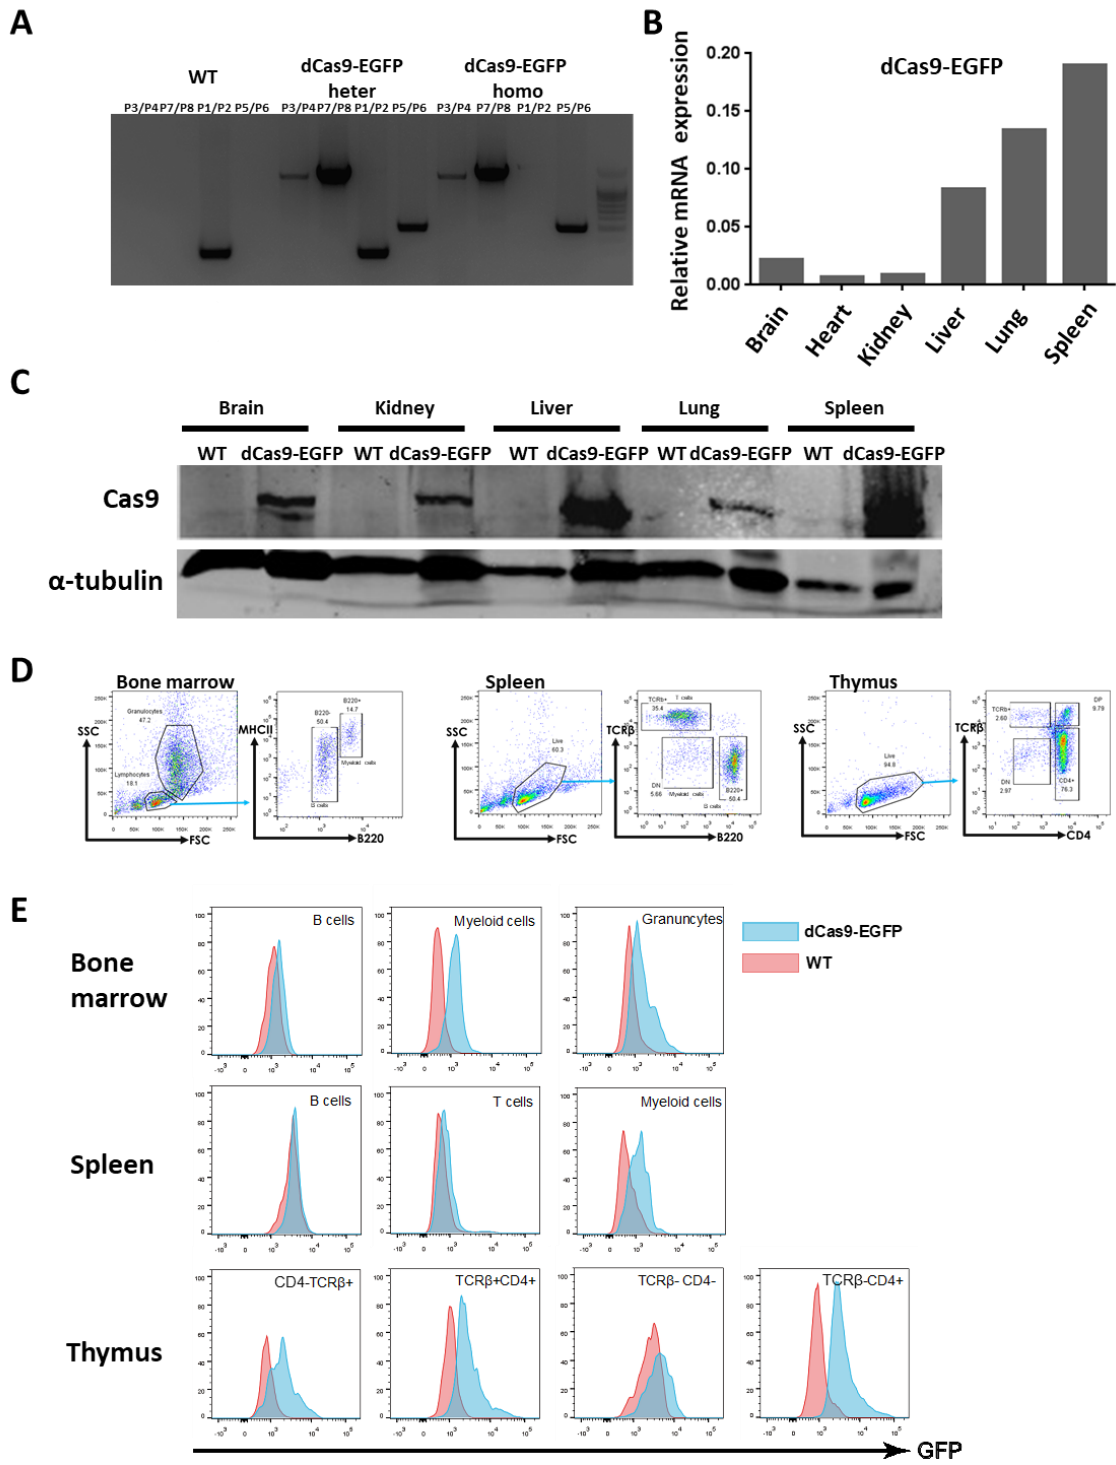

Figure S1

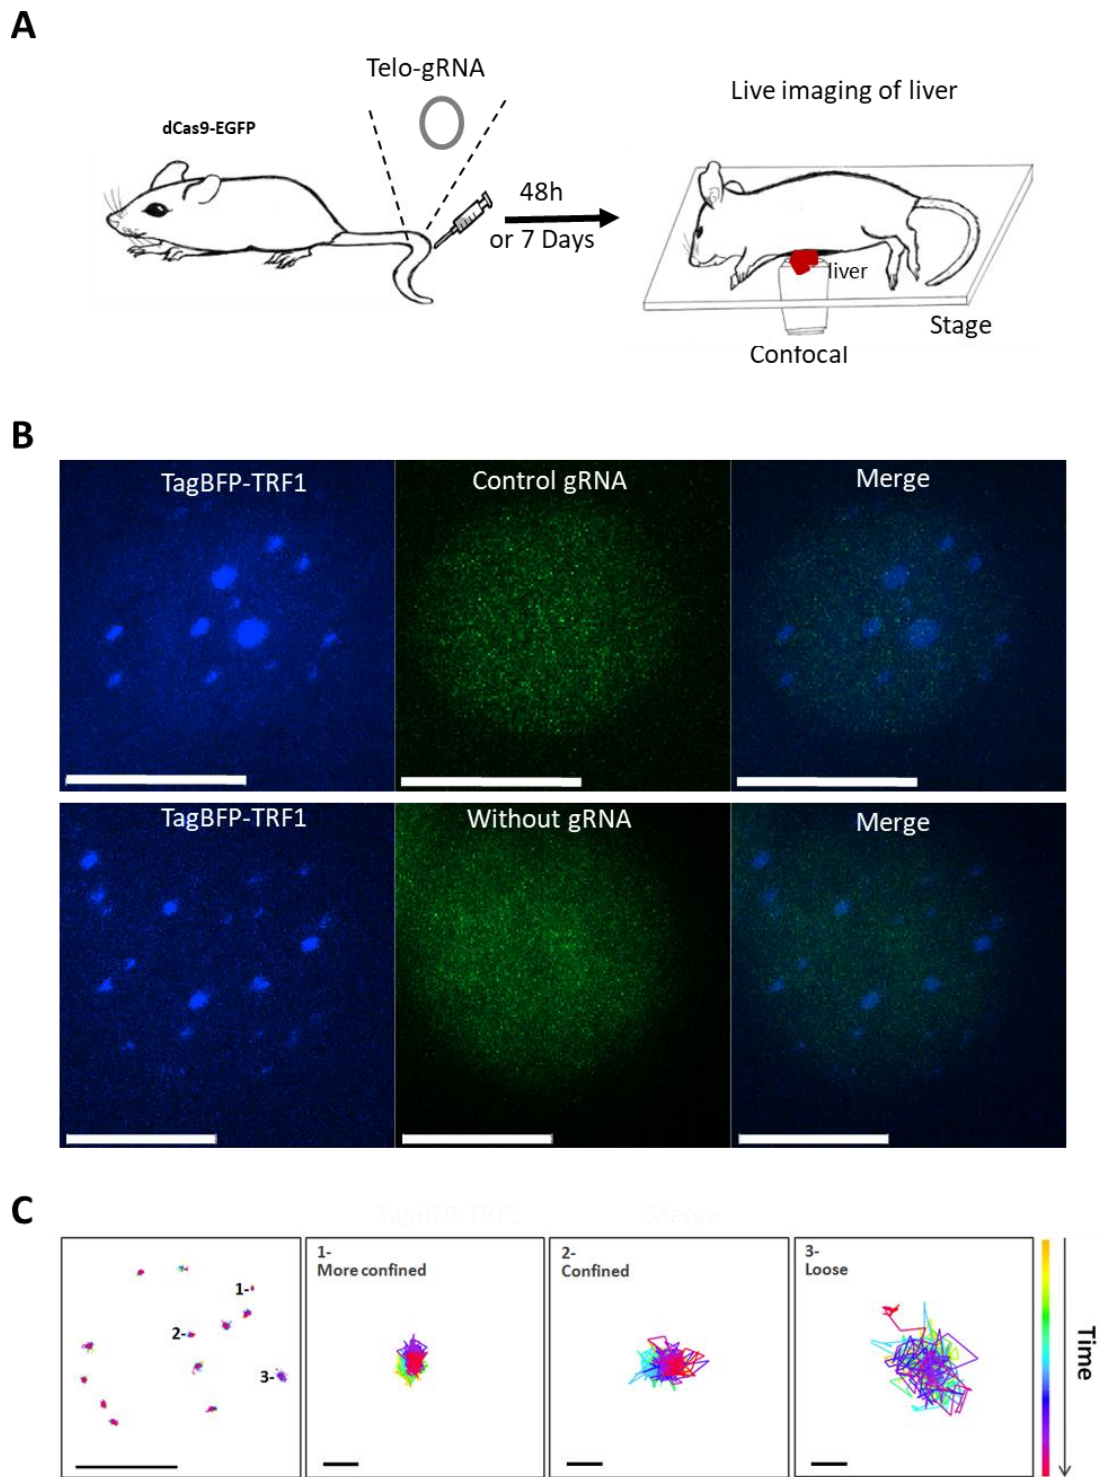

Figure S2

**A**

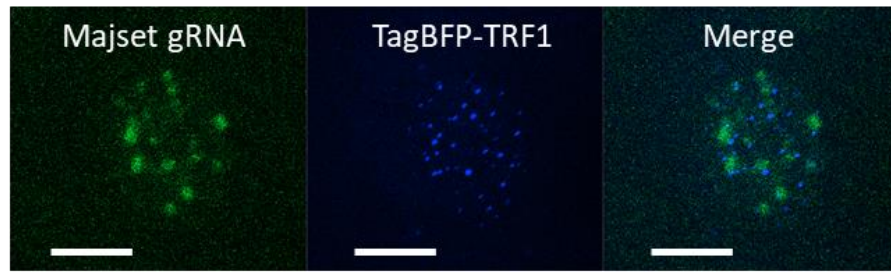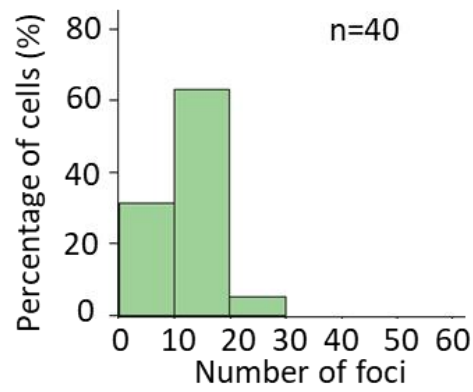

**B**

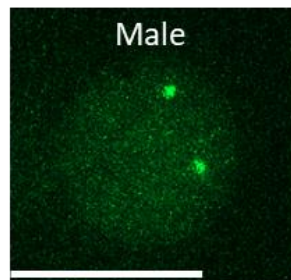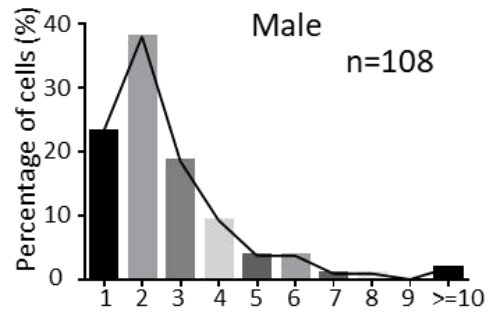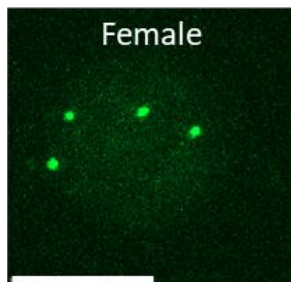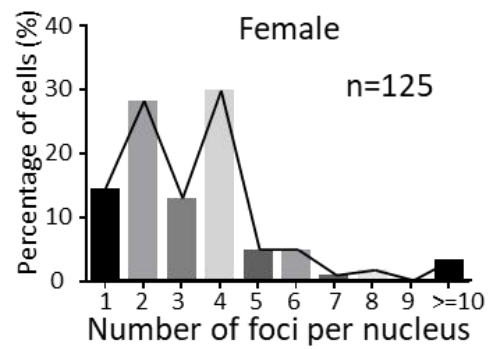

**Figure S3**

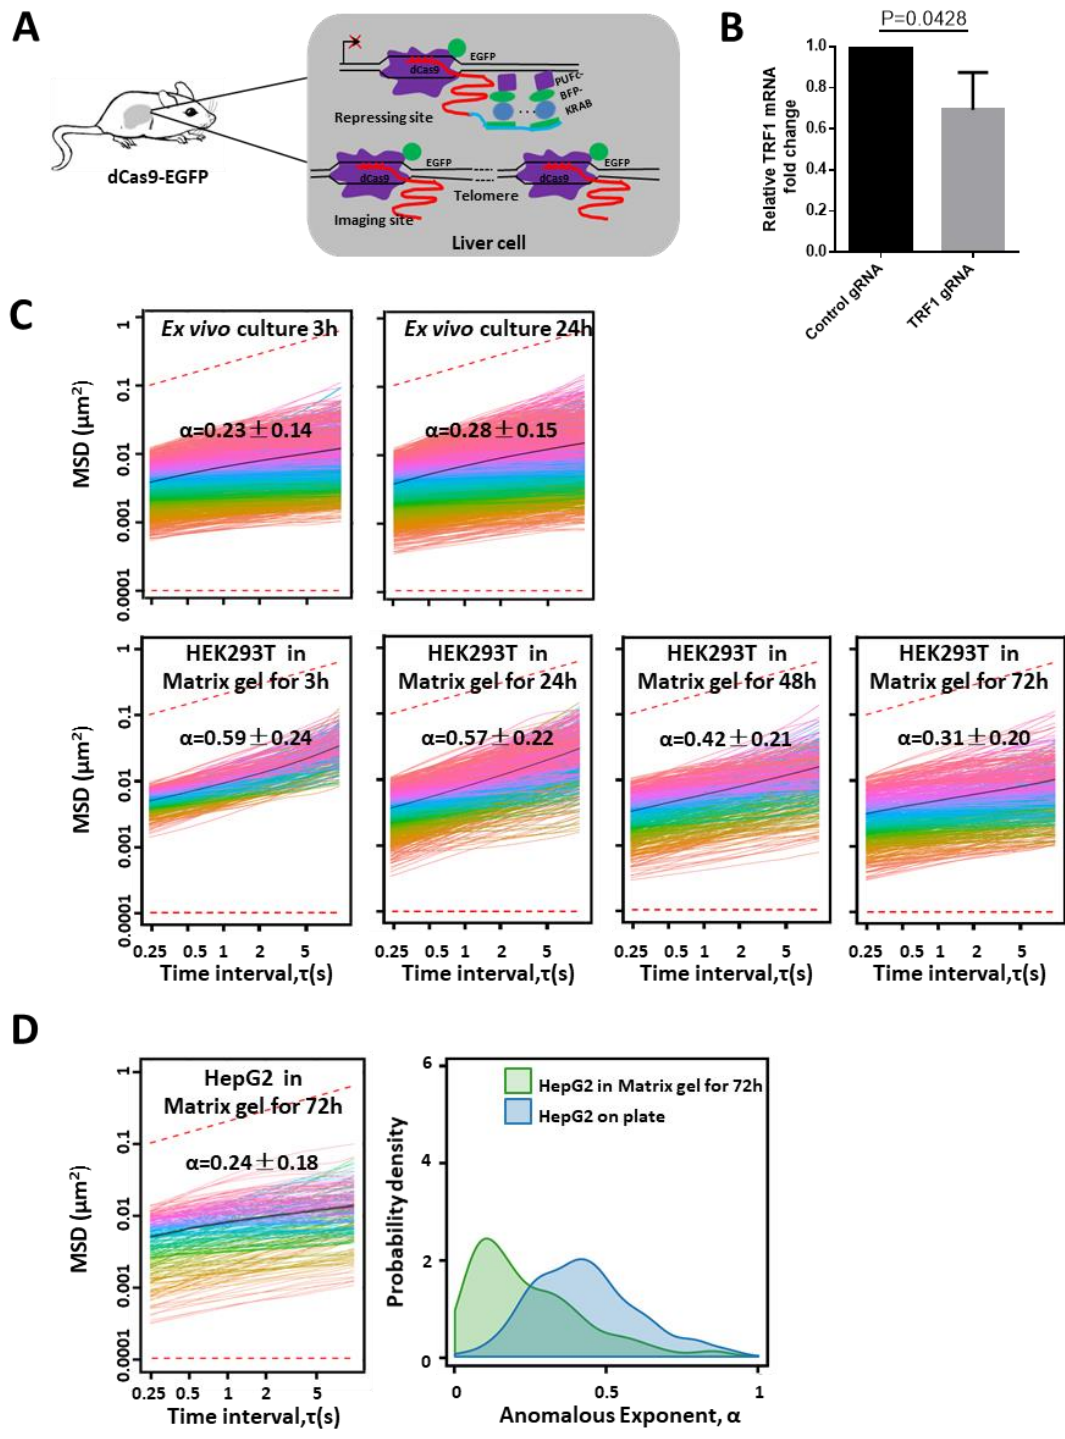

Figure S4



**E**

|                               | Number of mice | Experimental repeats | Cell number | Foci number | $MSD(t) = 4D_{\alpha} t^{\alpha}$ |                                                                     | $MSD(t) = A(1 - e^{-t/\tau}) + 4D_{macro}$         |                                                    |                           |
|-------------------------------|----------------|----------------------|-------------|-------------|-----------------------------------|---------------------------------------------------------------------|----------------------------------------------------|----------------------------------------------------|---------------------------|
|                               |                |                      |             |             | $\alpha$                          | $D_{\alpha}$<br>( $\mu\text{m}^2\text{s}^{-\alpha}\times 10^{-4}$ ) | $D_{micro}$<br>( $10^{-3}\mu\text{m}^2/\text{s}$ ) | $D_{macro}$<br>( $10^{-5}\mu\text{m}^2/\text{s}$ ) | $L_{confinement}$<br>(nm) |
| dCas9-EGFP mouse liver        | 5              |                      | 129         | 1055        | $0.18 \pm 0.15$                   | $29.49 \pm 15.55$                                                   | $9.66 \pm 4.53$                                    | $9.07 \pm 37.51$                                   | $83.17 \pm 36.01$         |
| <i>Ex vivo</i> culture 3h     | 4              |                      | 84          | 1127        | $0.23 \pm 0.14$                   | $16.01 \pm 12.70$                                                   | $5.12 \pm 3.75$                                    | $10.09 \pm 20.49$                                  | $57.18 \pm 28.44$         |
| <i>Ex vivo</i> culture 24h    | 4              |                      | 87          | 1502        | $0.28 \pm 0.15$                   | $17.22 \pm 14.80$                                                   | $4.16 \pm 3.42$                                    | $11.35 \pm 33.01$                                  | $61.17 \pm 38.22$         |
| HEK293T                       |                | 3                    | 67          | 590         | $0.46 \pm 0.20$                   | $24.70 \pm 15.59$                                                   | $5.50 \pm 4.18$                                    | $36.76 \pm 54.38$                                  | $76.72 \pm 41.37$         |
| Hep1-6                        |                | 3                    | 64          | 867         | $0.52 \pm 0.25$                   | $22.71 \pm 14.42$                                                   | $4.95 \pm 3.30$                                    | $42.37 \pm 56.31$                                  | $74.77 \pm 43.65$         |
| HepG2                         |                | 3                    | 58          | 691         | $0.45 \pm 0.22$                   | $26.98 \pm 15.21$                                                   | $4.98 \pm 2.94$                                    | $37.11 \pm 73.95$                                  | $86.10 \pm 51.30$         |
| HEK293T in Matrix gel for 3h  |                | 2                    | 30          | 295         | $0.59 \pm 0.24$                   | $20.70 \pm 9.33$                                                    | $5.48 \pm 3.68$                                    | $52.46 \pm 39.68$                                  | $69.33 \pm 24.50$         |
| HEK293T in Matrix gel for 24h |                | 4                    | 74          | 827         | $0.57 \pm 0.22$                   | $18.85 \pm 12.24$                                                   | $3.64 \pm 3.14$                                    | $43.40 \pm 55.07$                                  | $68.48 \pm 39.53$         |
| HEK293T in Matrix gel for 48h |                | 4                    | 42          | 485         | $0.42 \pm 0.21$                   | $14.20 \pm 9.59$                                                    | $3.62 \pm 3.38$                                    | $19.10 \pm 25.81$                                  | $57.10 \pm 26.66$         |
| HEK293T in Matrix gel for 72h |                | 4                    | 53          | 597         | $0.31 \pm 0.20$                   | $12.24 \pm 10.98$                                                   | $4.68 \pm 4.42$                                    | $10.45 \pm 23.93$                                  | $49.72 \pm 29.09$         |
| HepG2 in Matrix gel for 72h   |                | 3                    | 26          | 243         | $0.24 \pm 0.18$                   | $19.70 \pm 14.90$                                                   | $7.30 \pm 5.38$                                    | $10.32 \pm 17.02$                                  | $62.52 \pm 27.79$         |

**Figure S4 (continued)**
